# Supplementary material
Source: MDPI journal article supplement (https://www.mdpi.com/1999-4907/10/11/995)

Nr Homologous Species Distribution

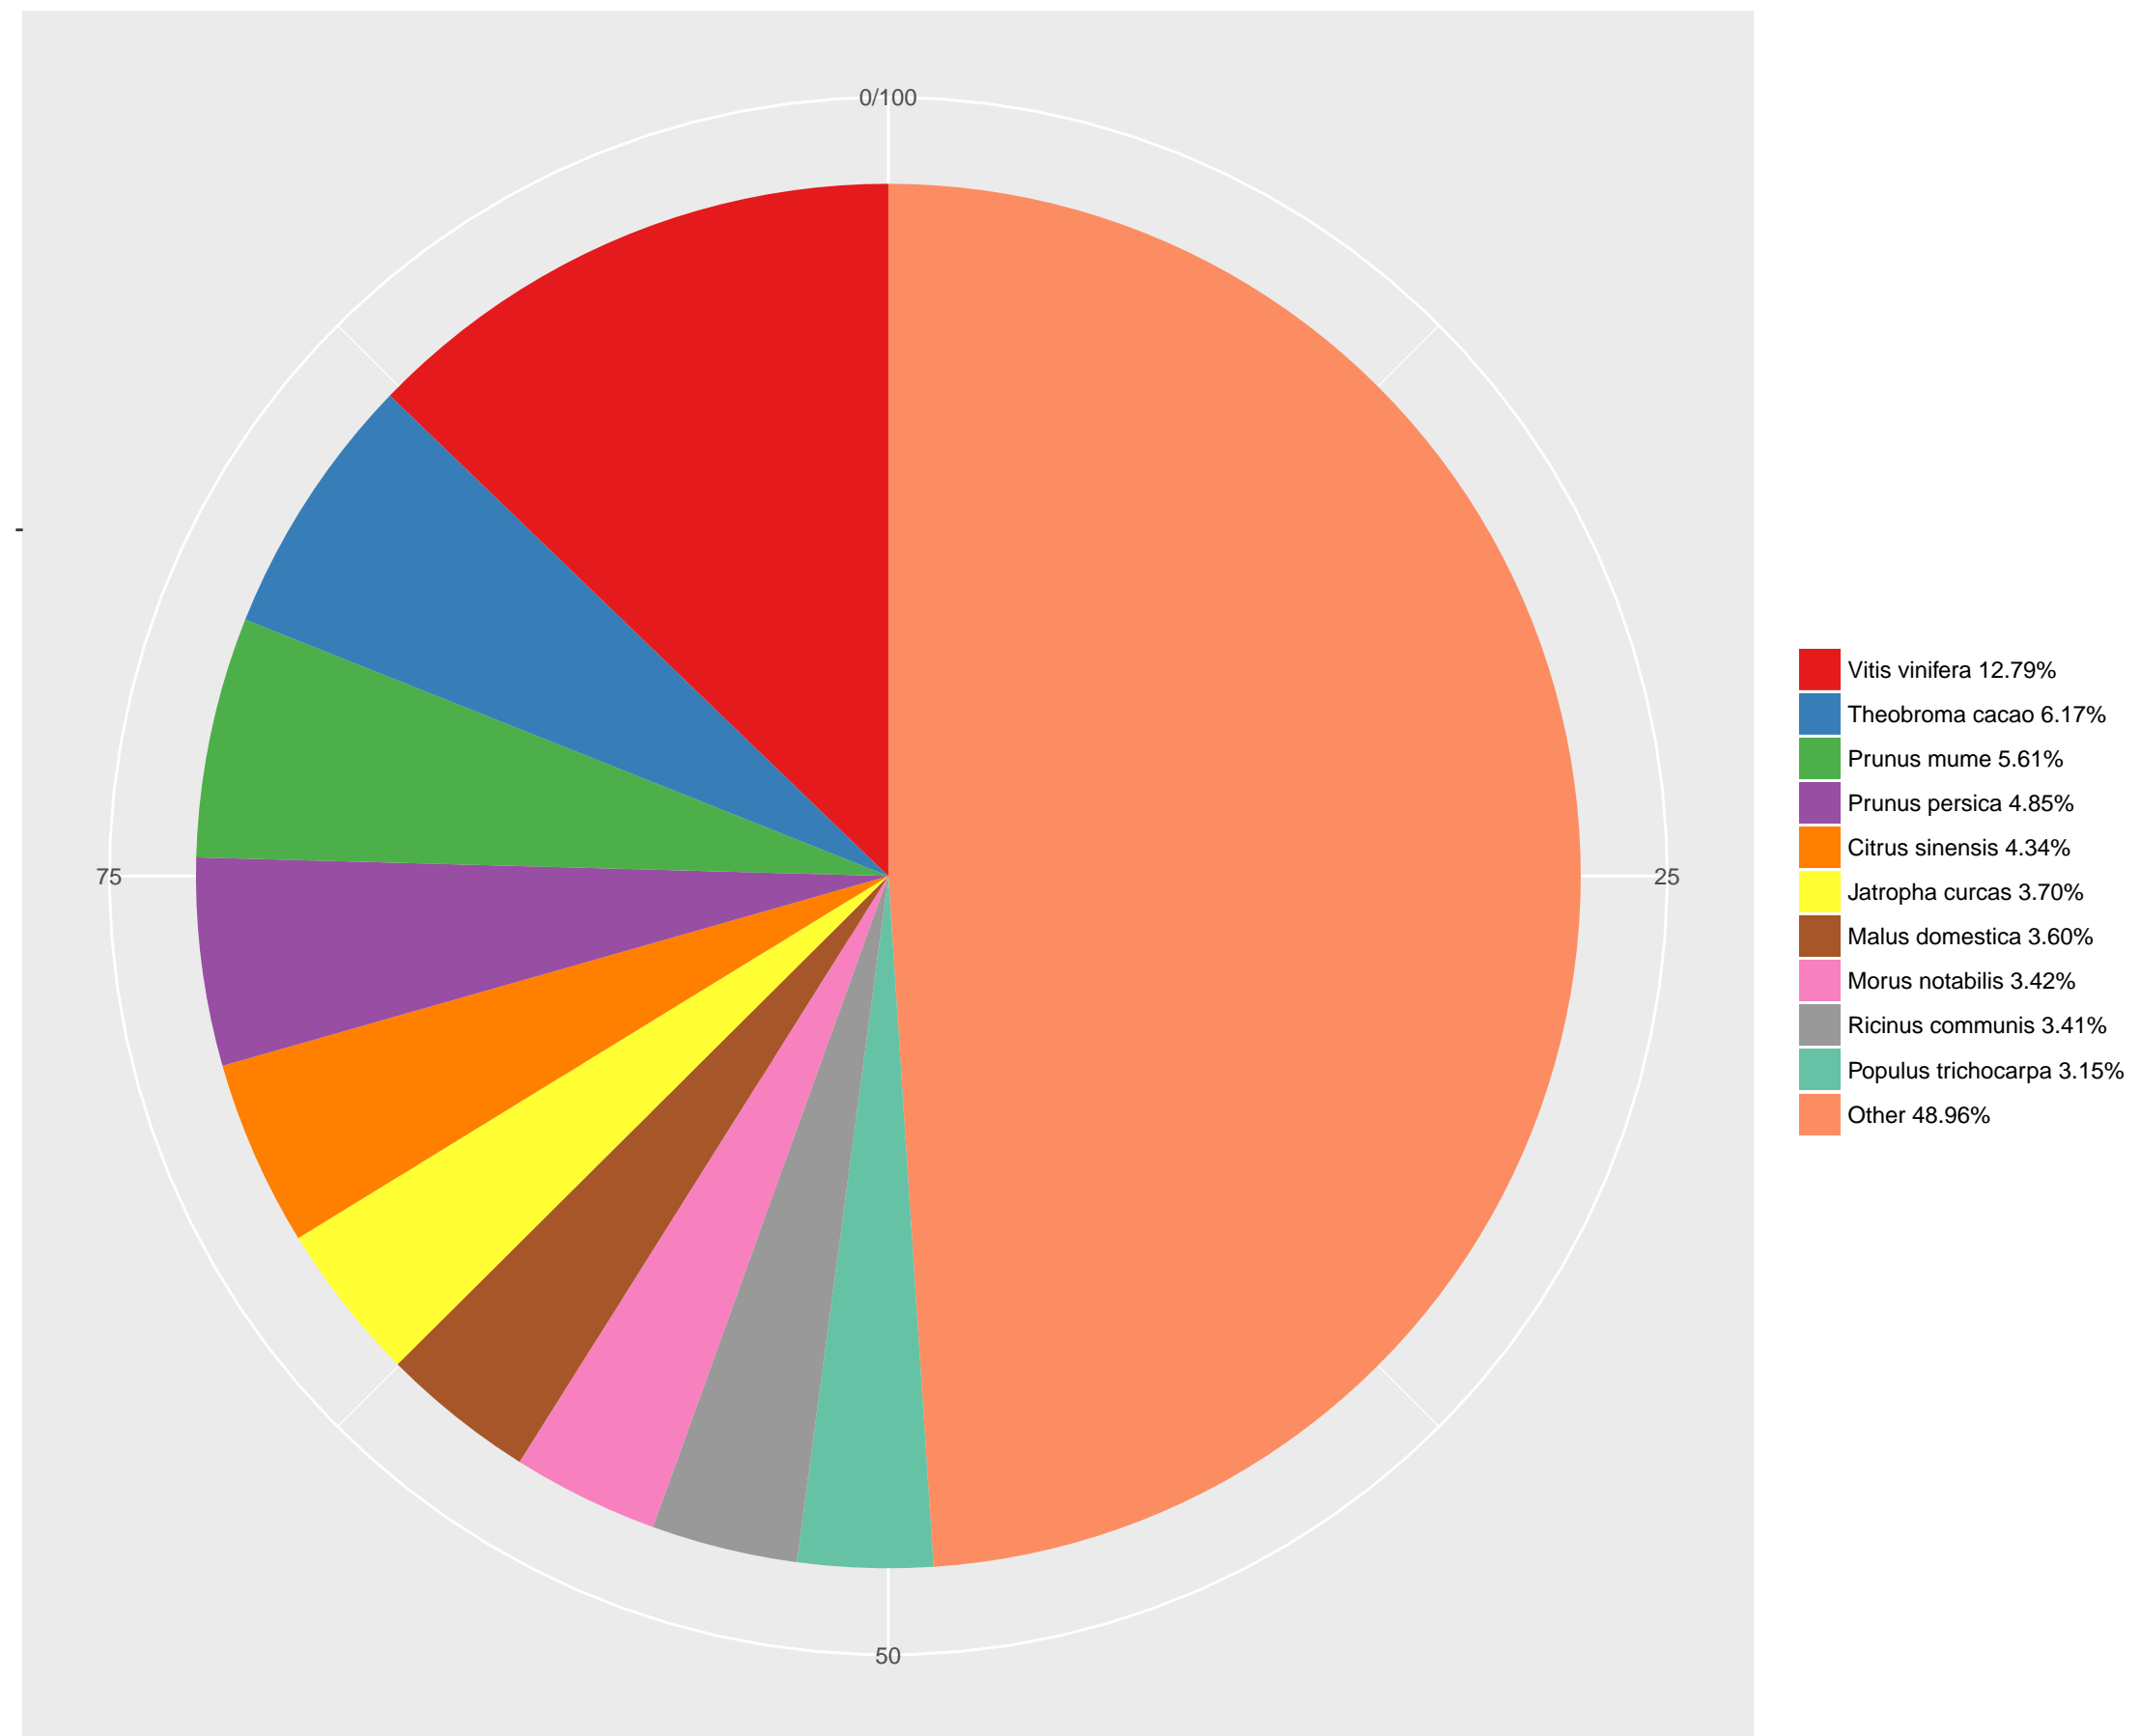

Supplement: s1 [file s1]

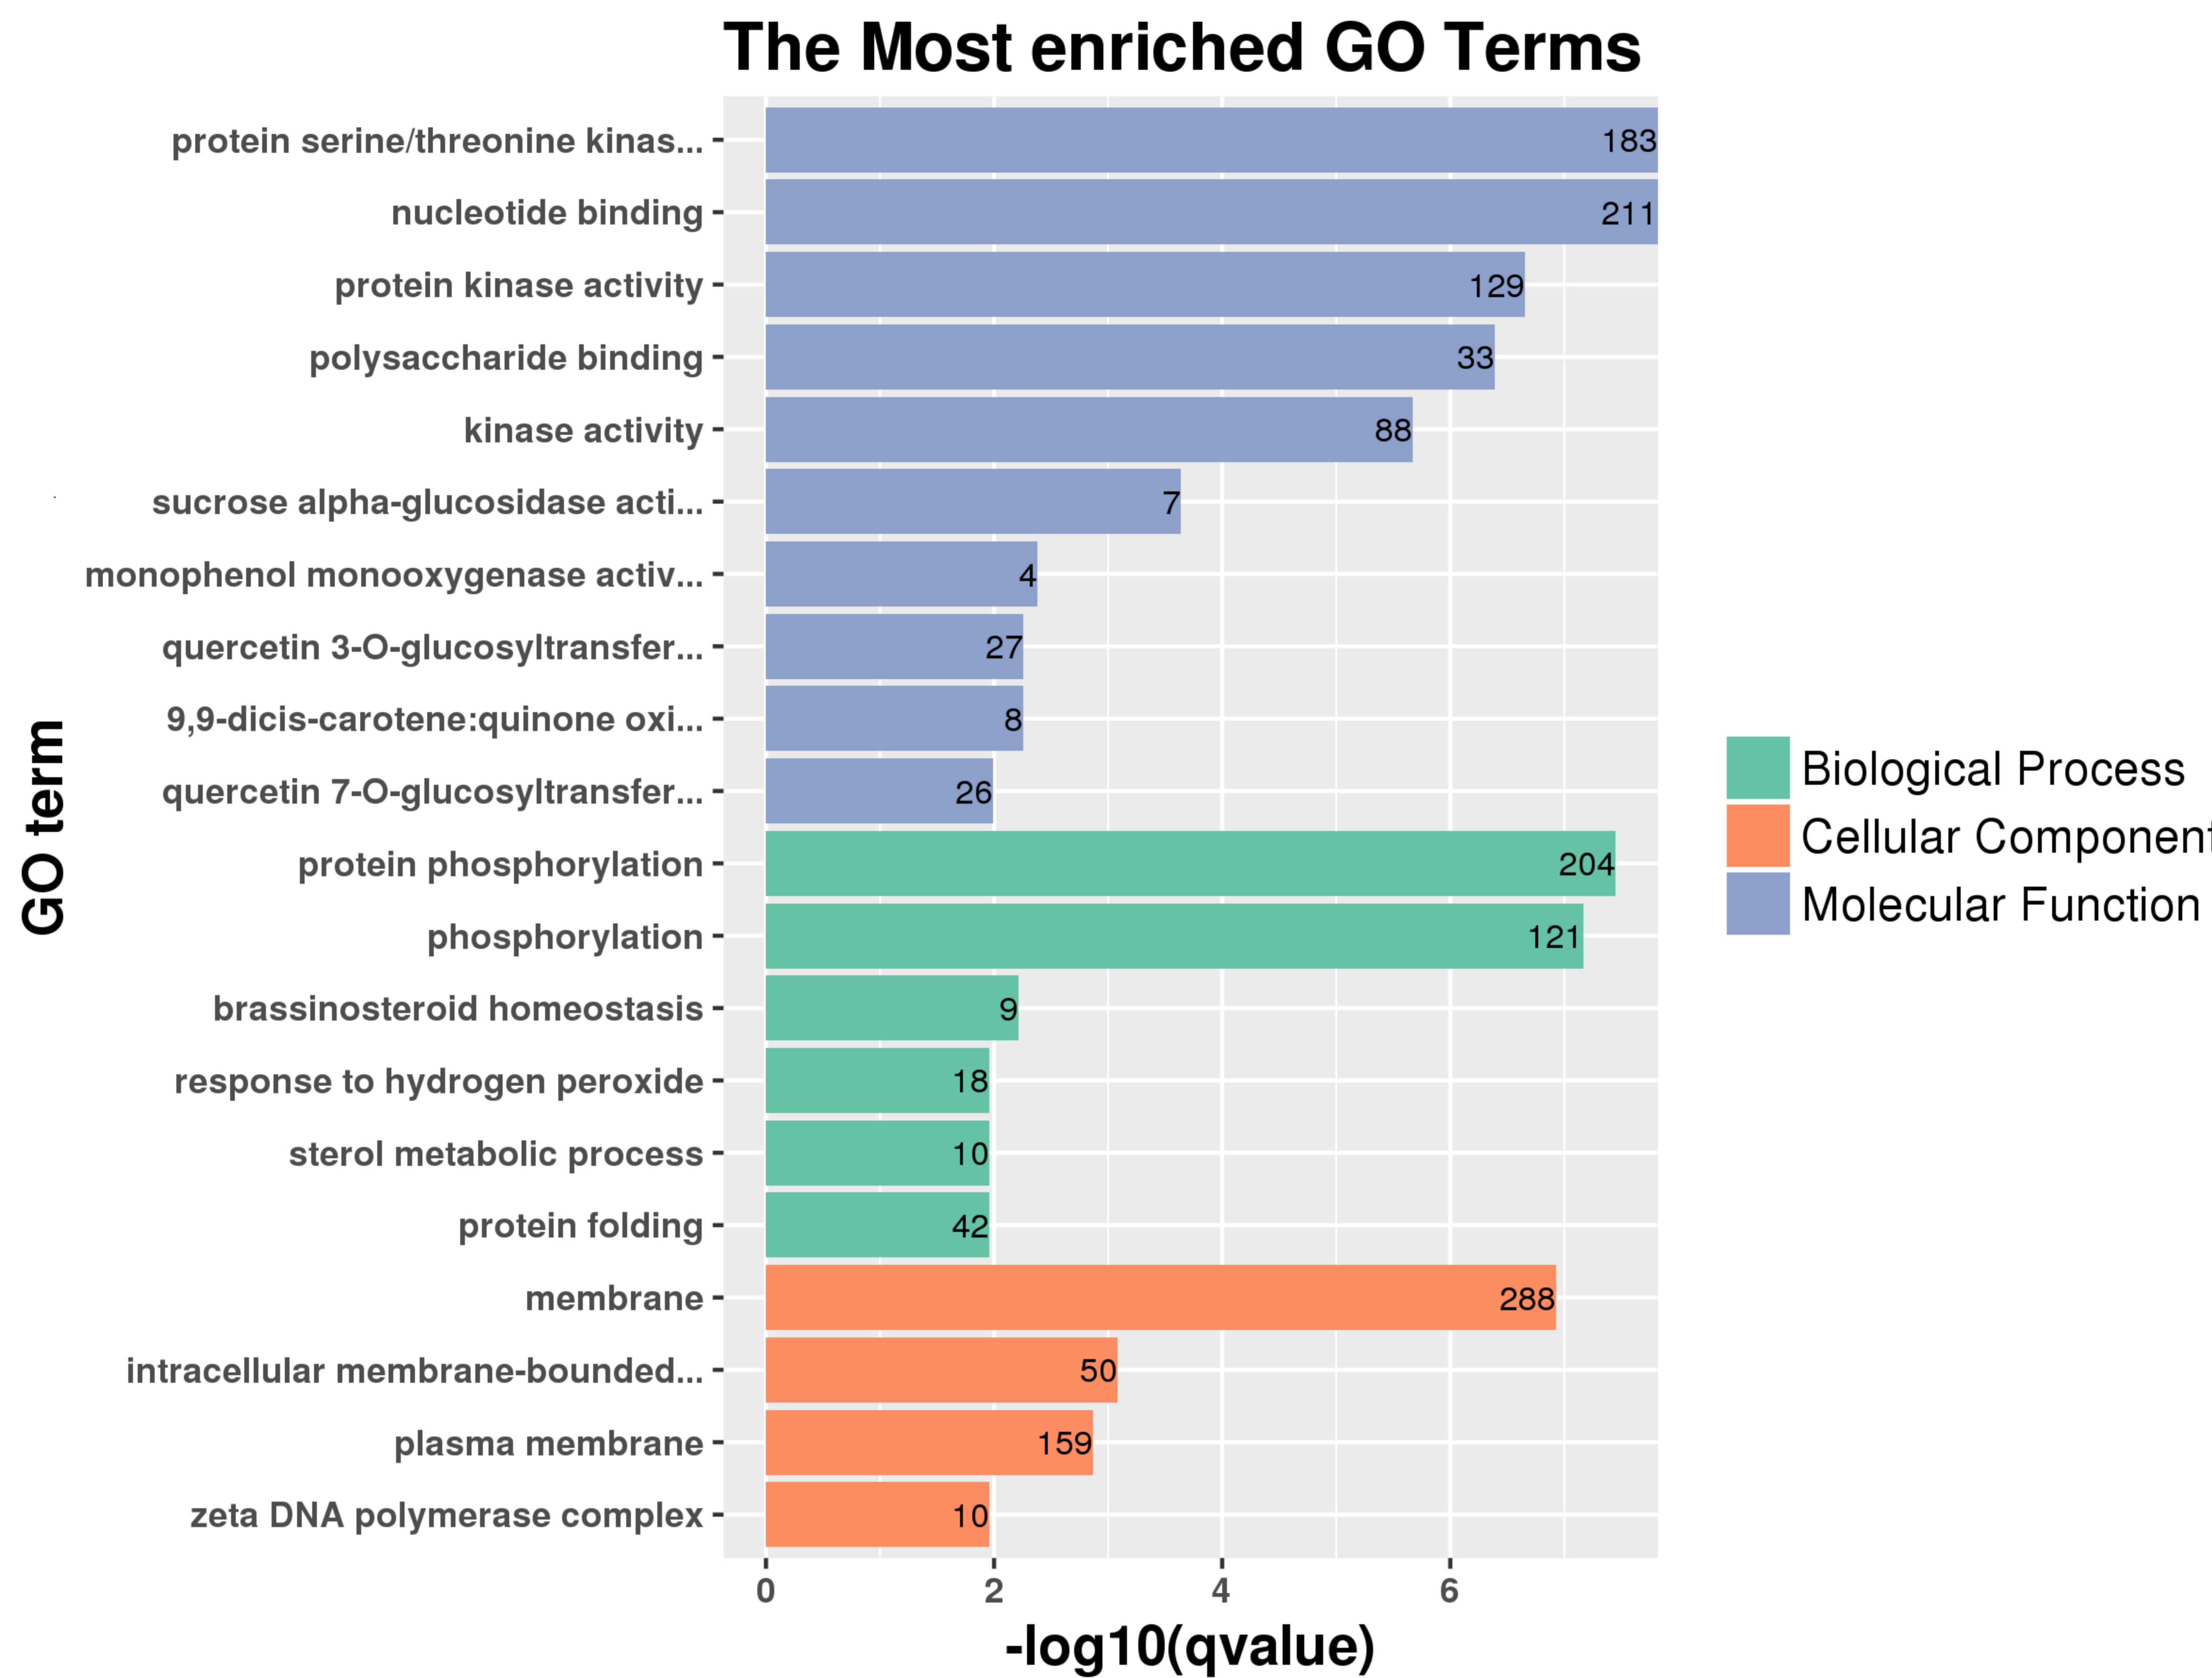

(a)

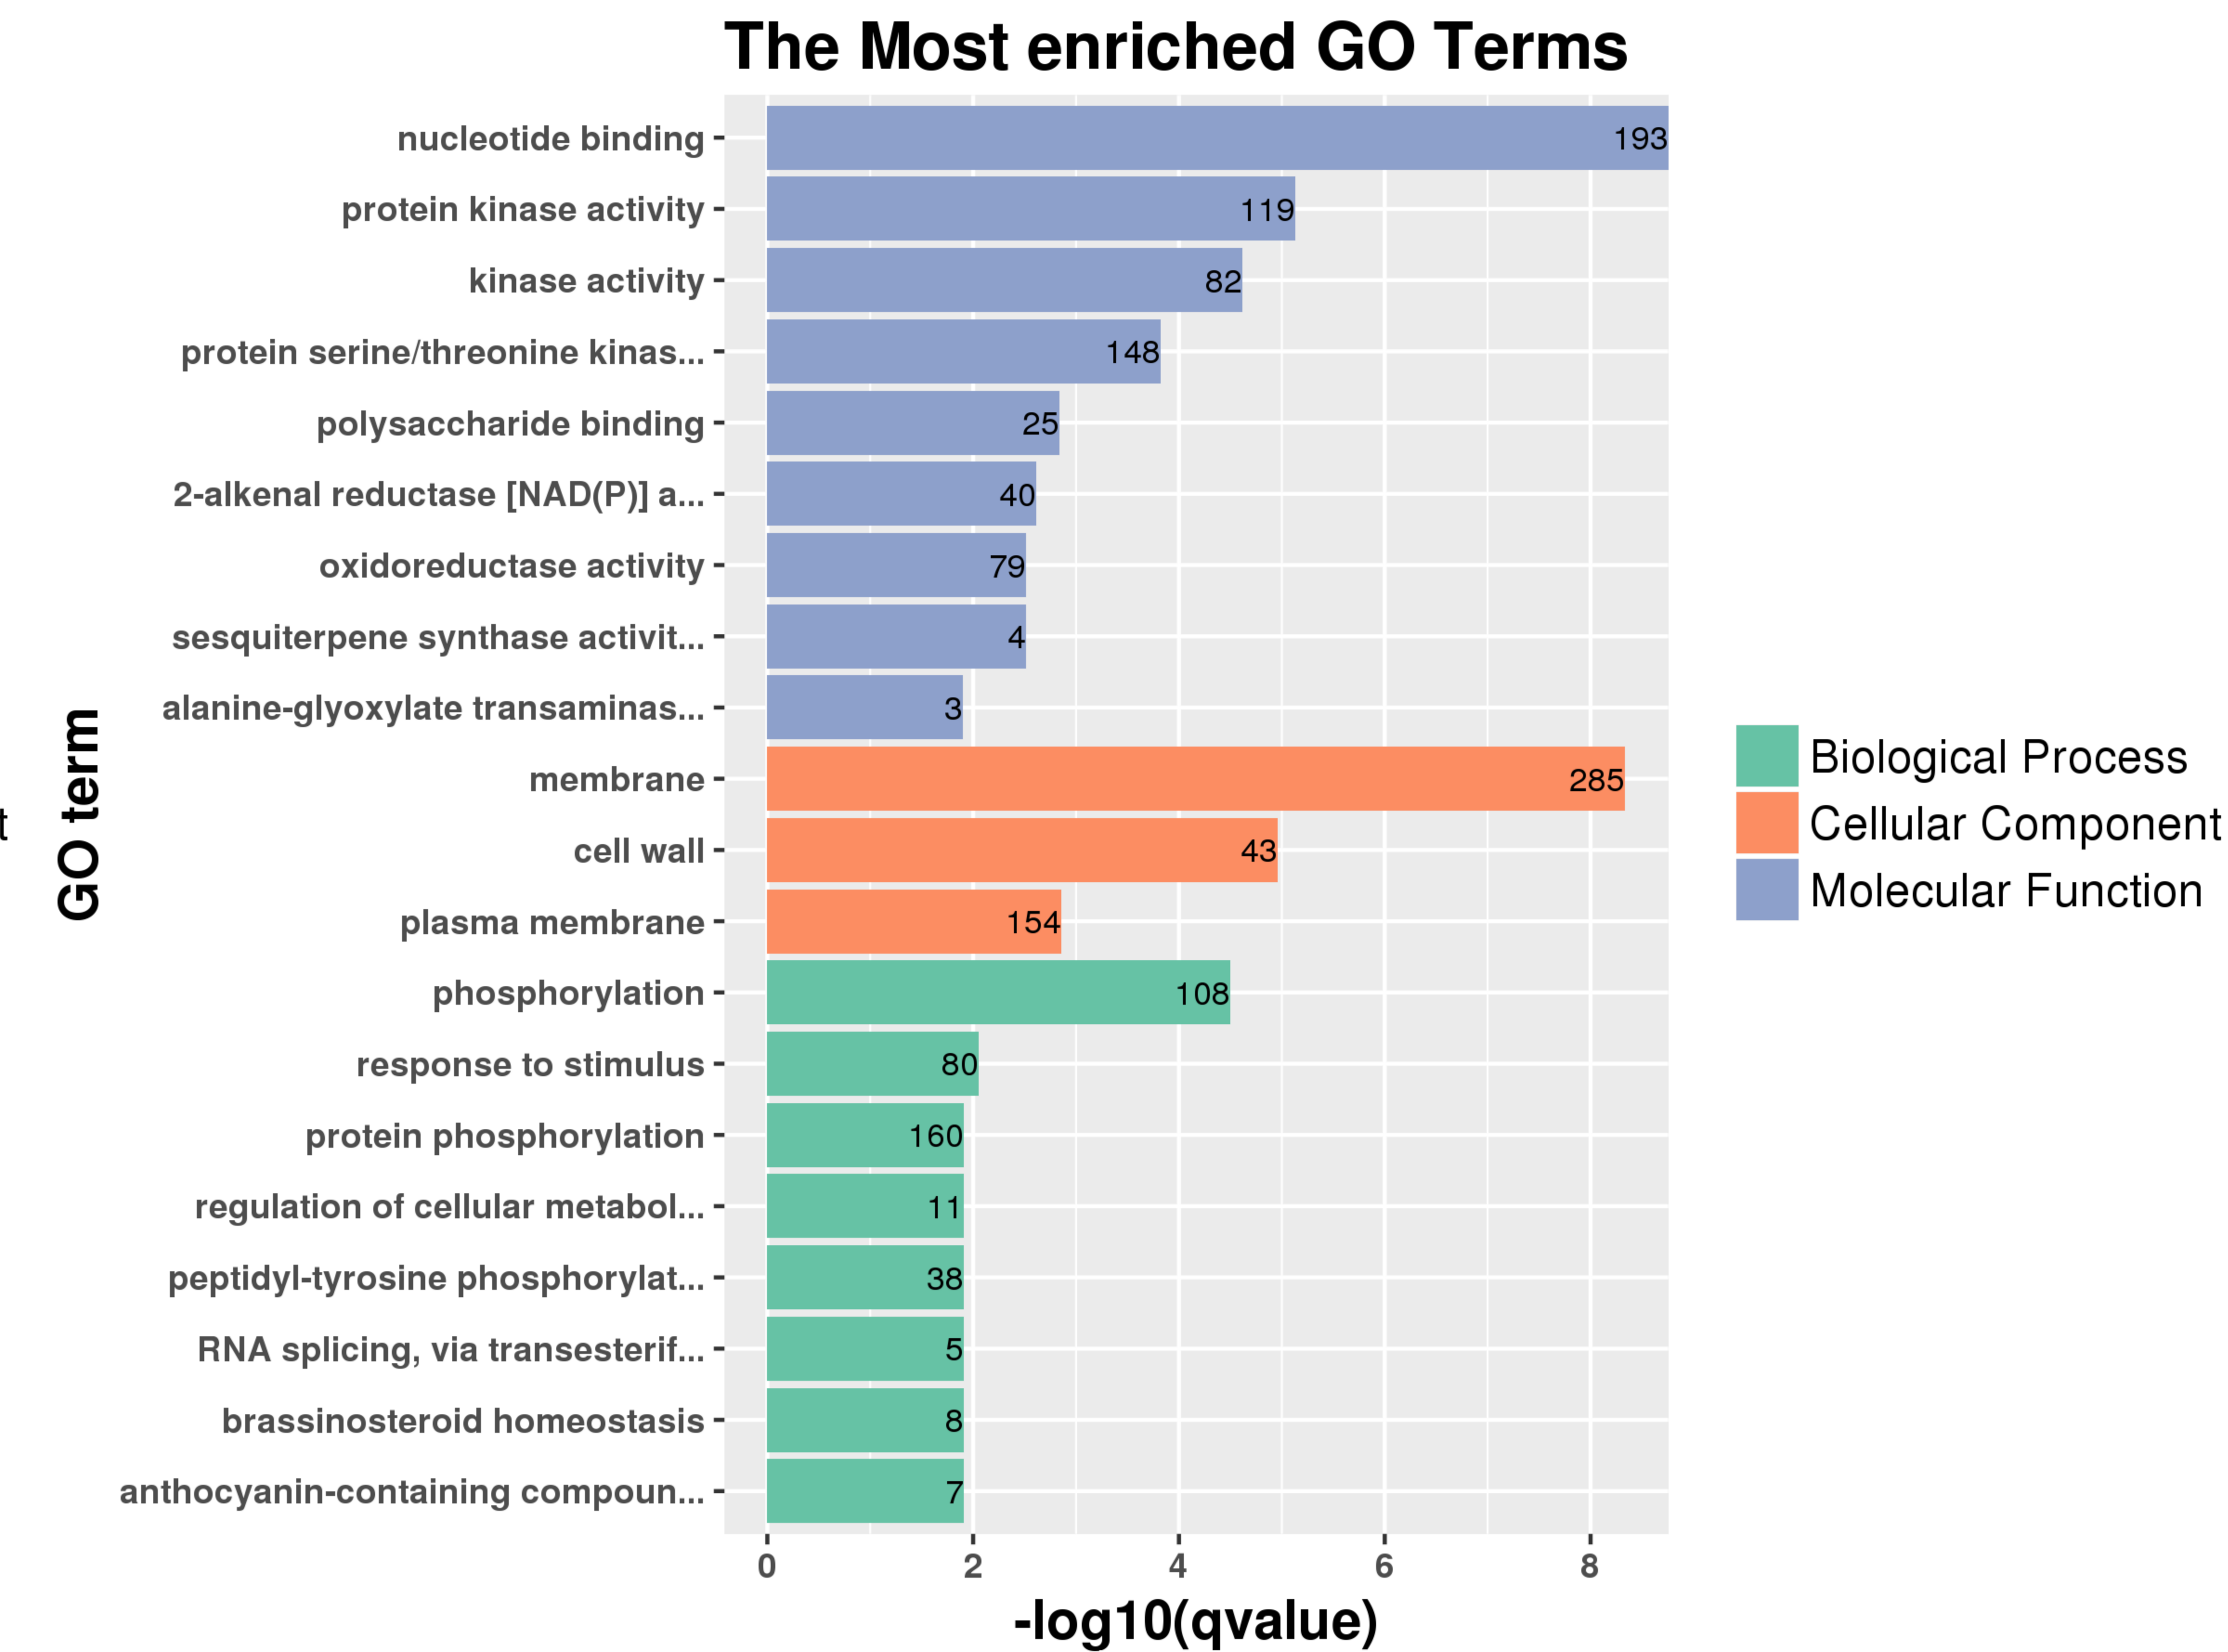

(b)

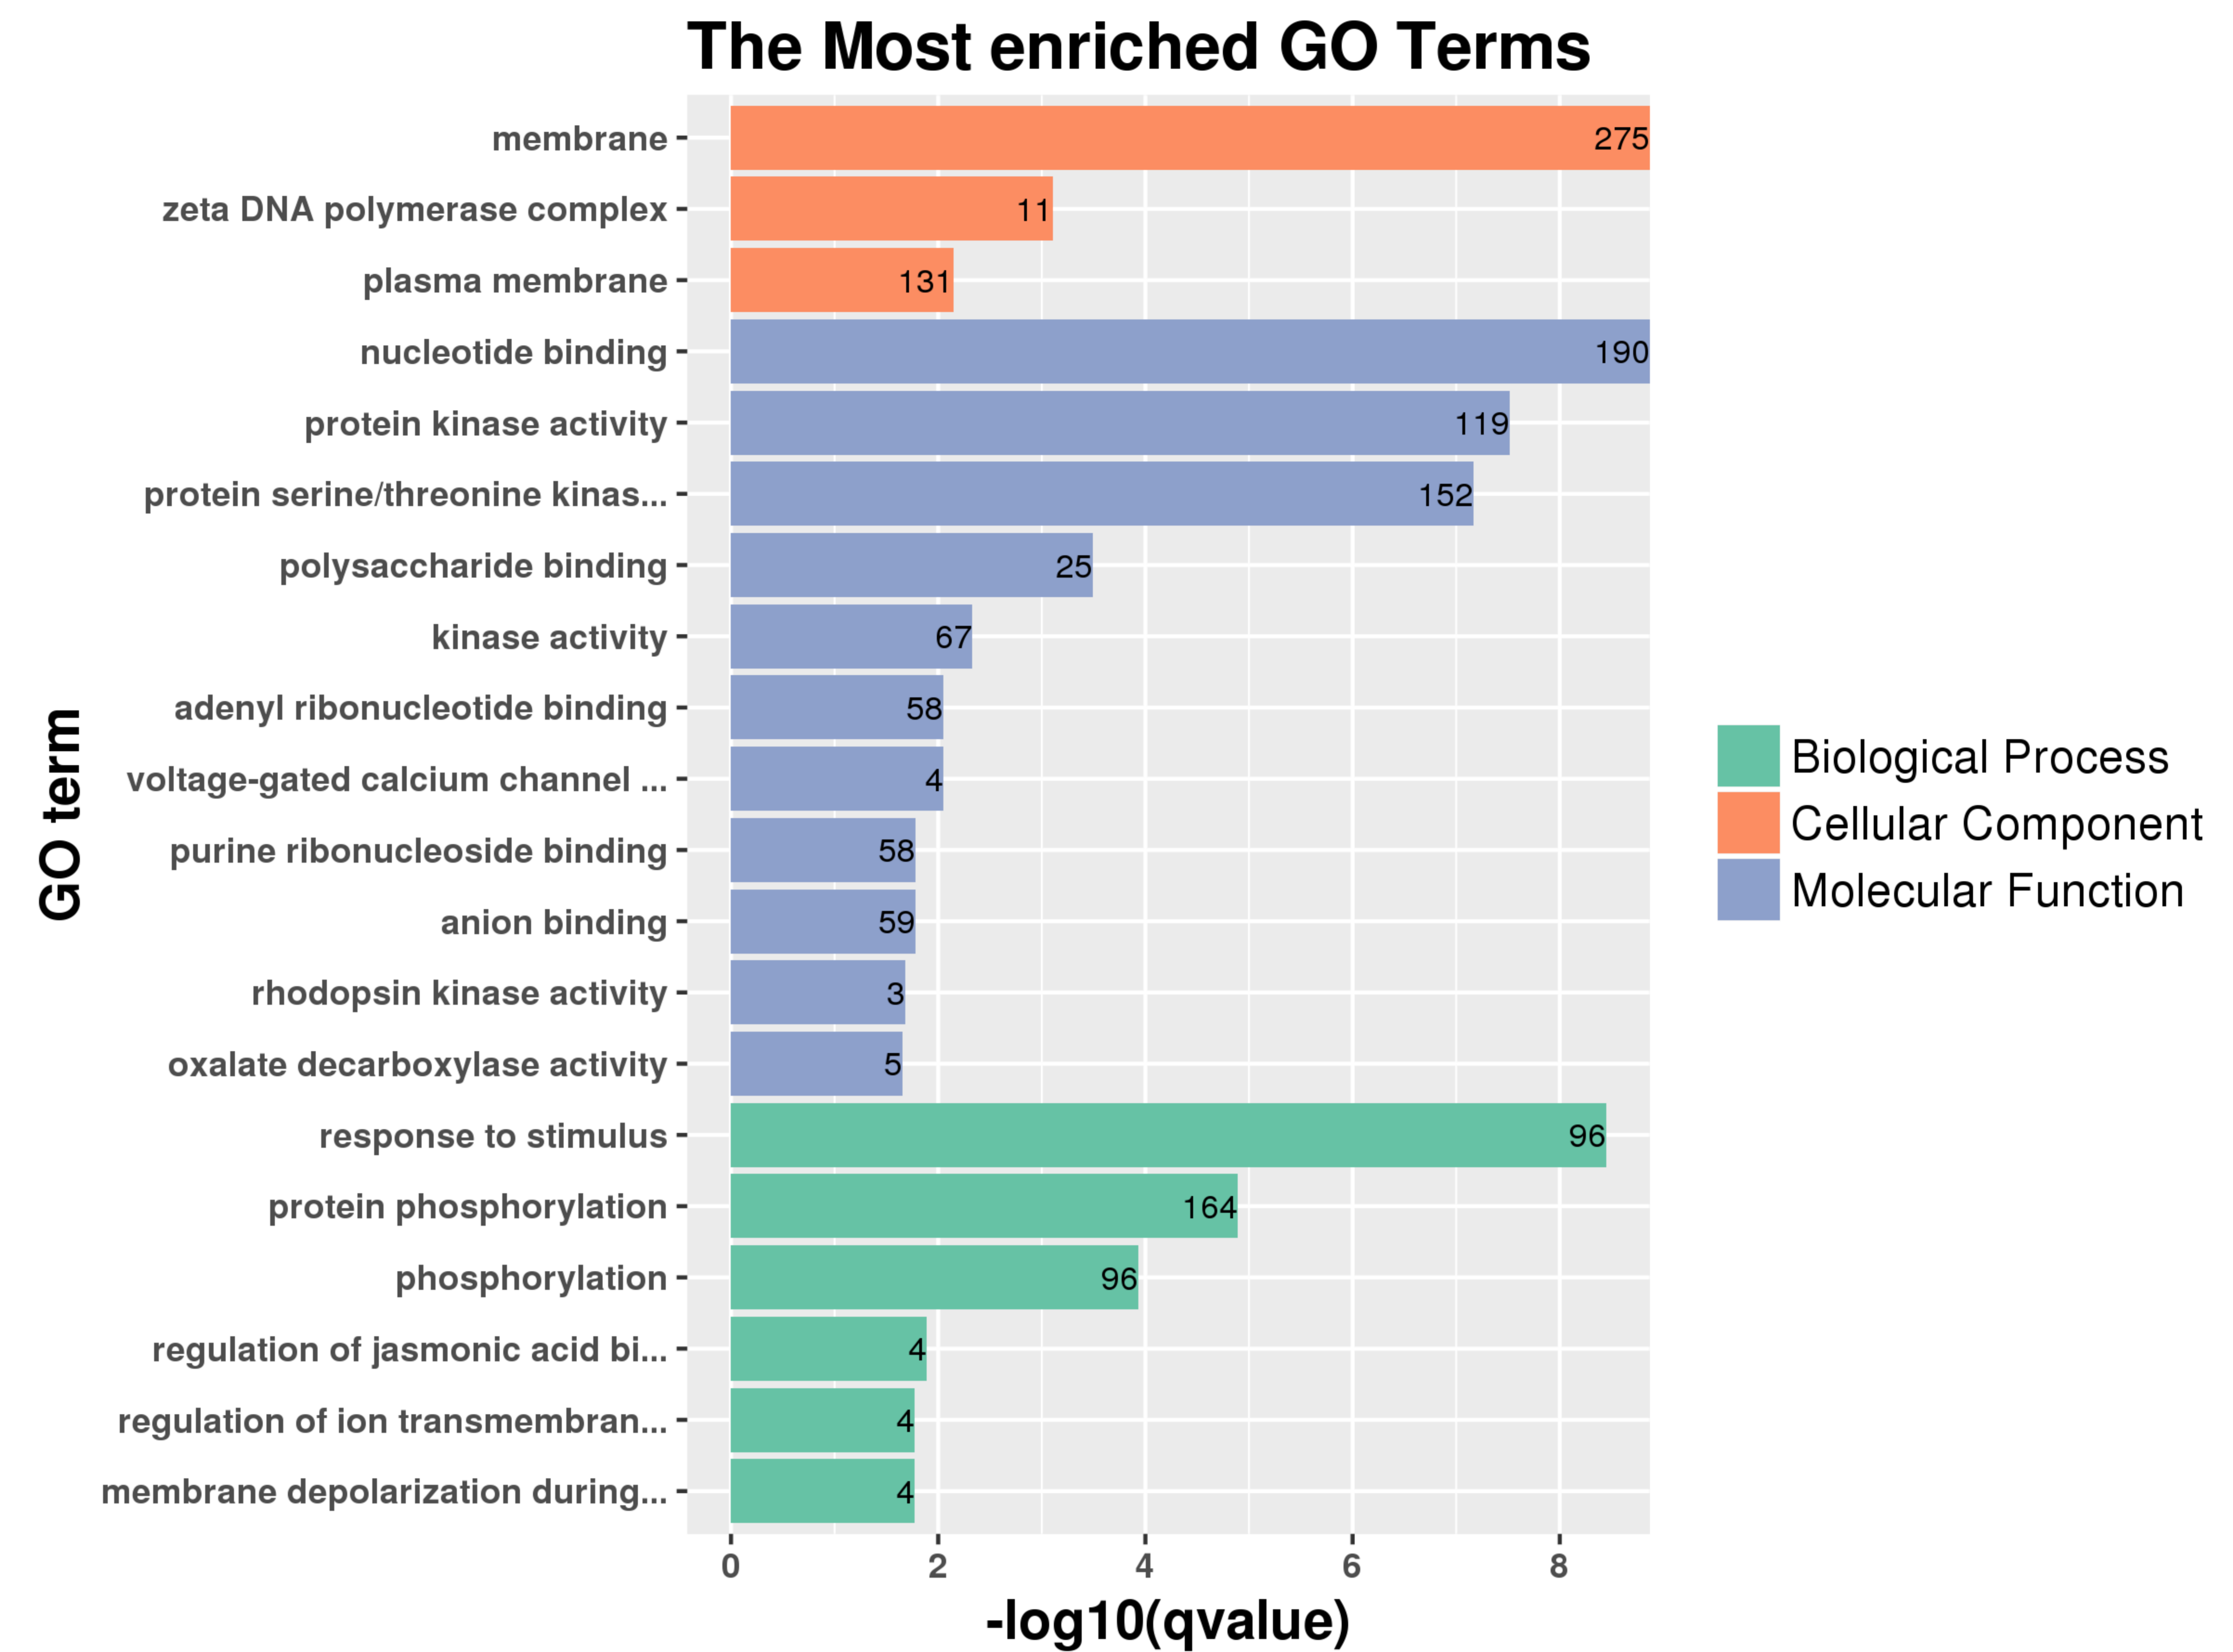

(c)

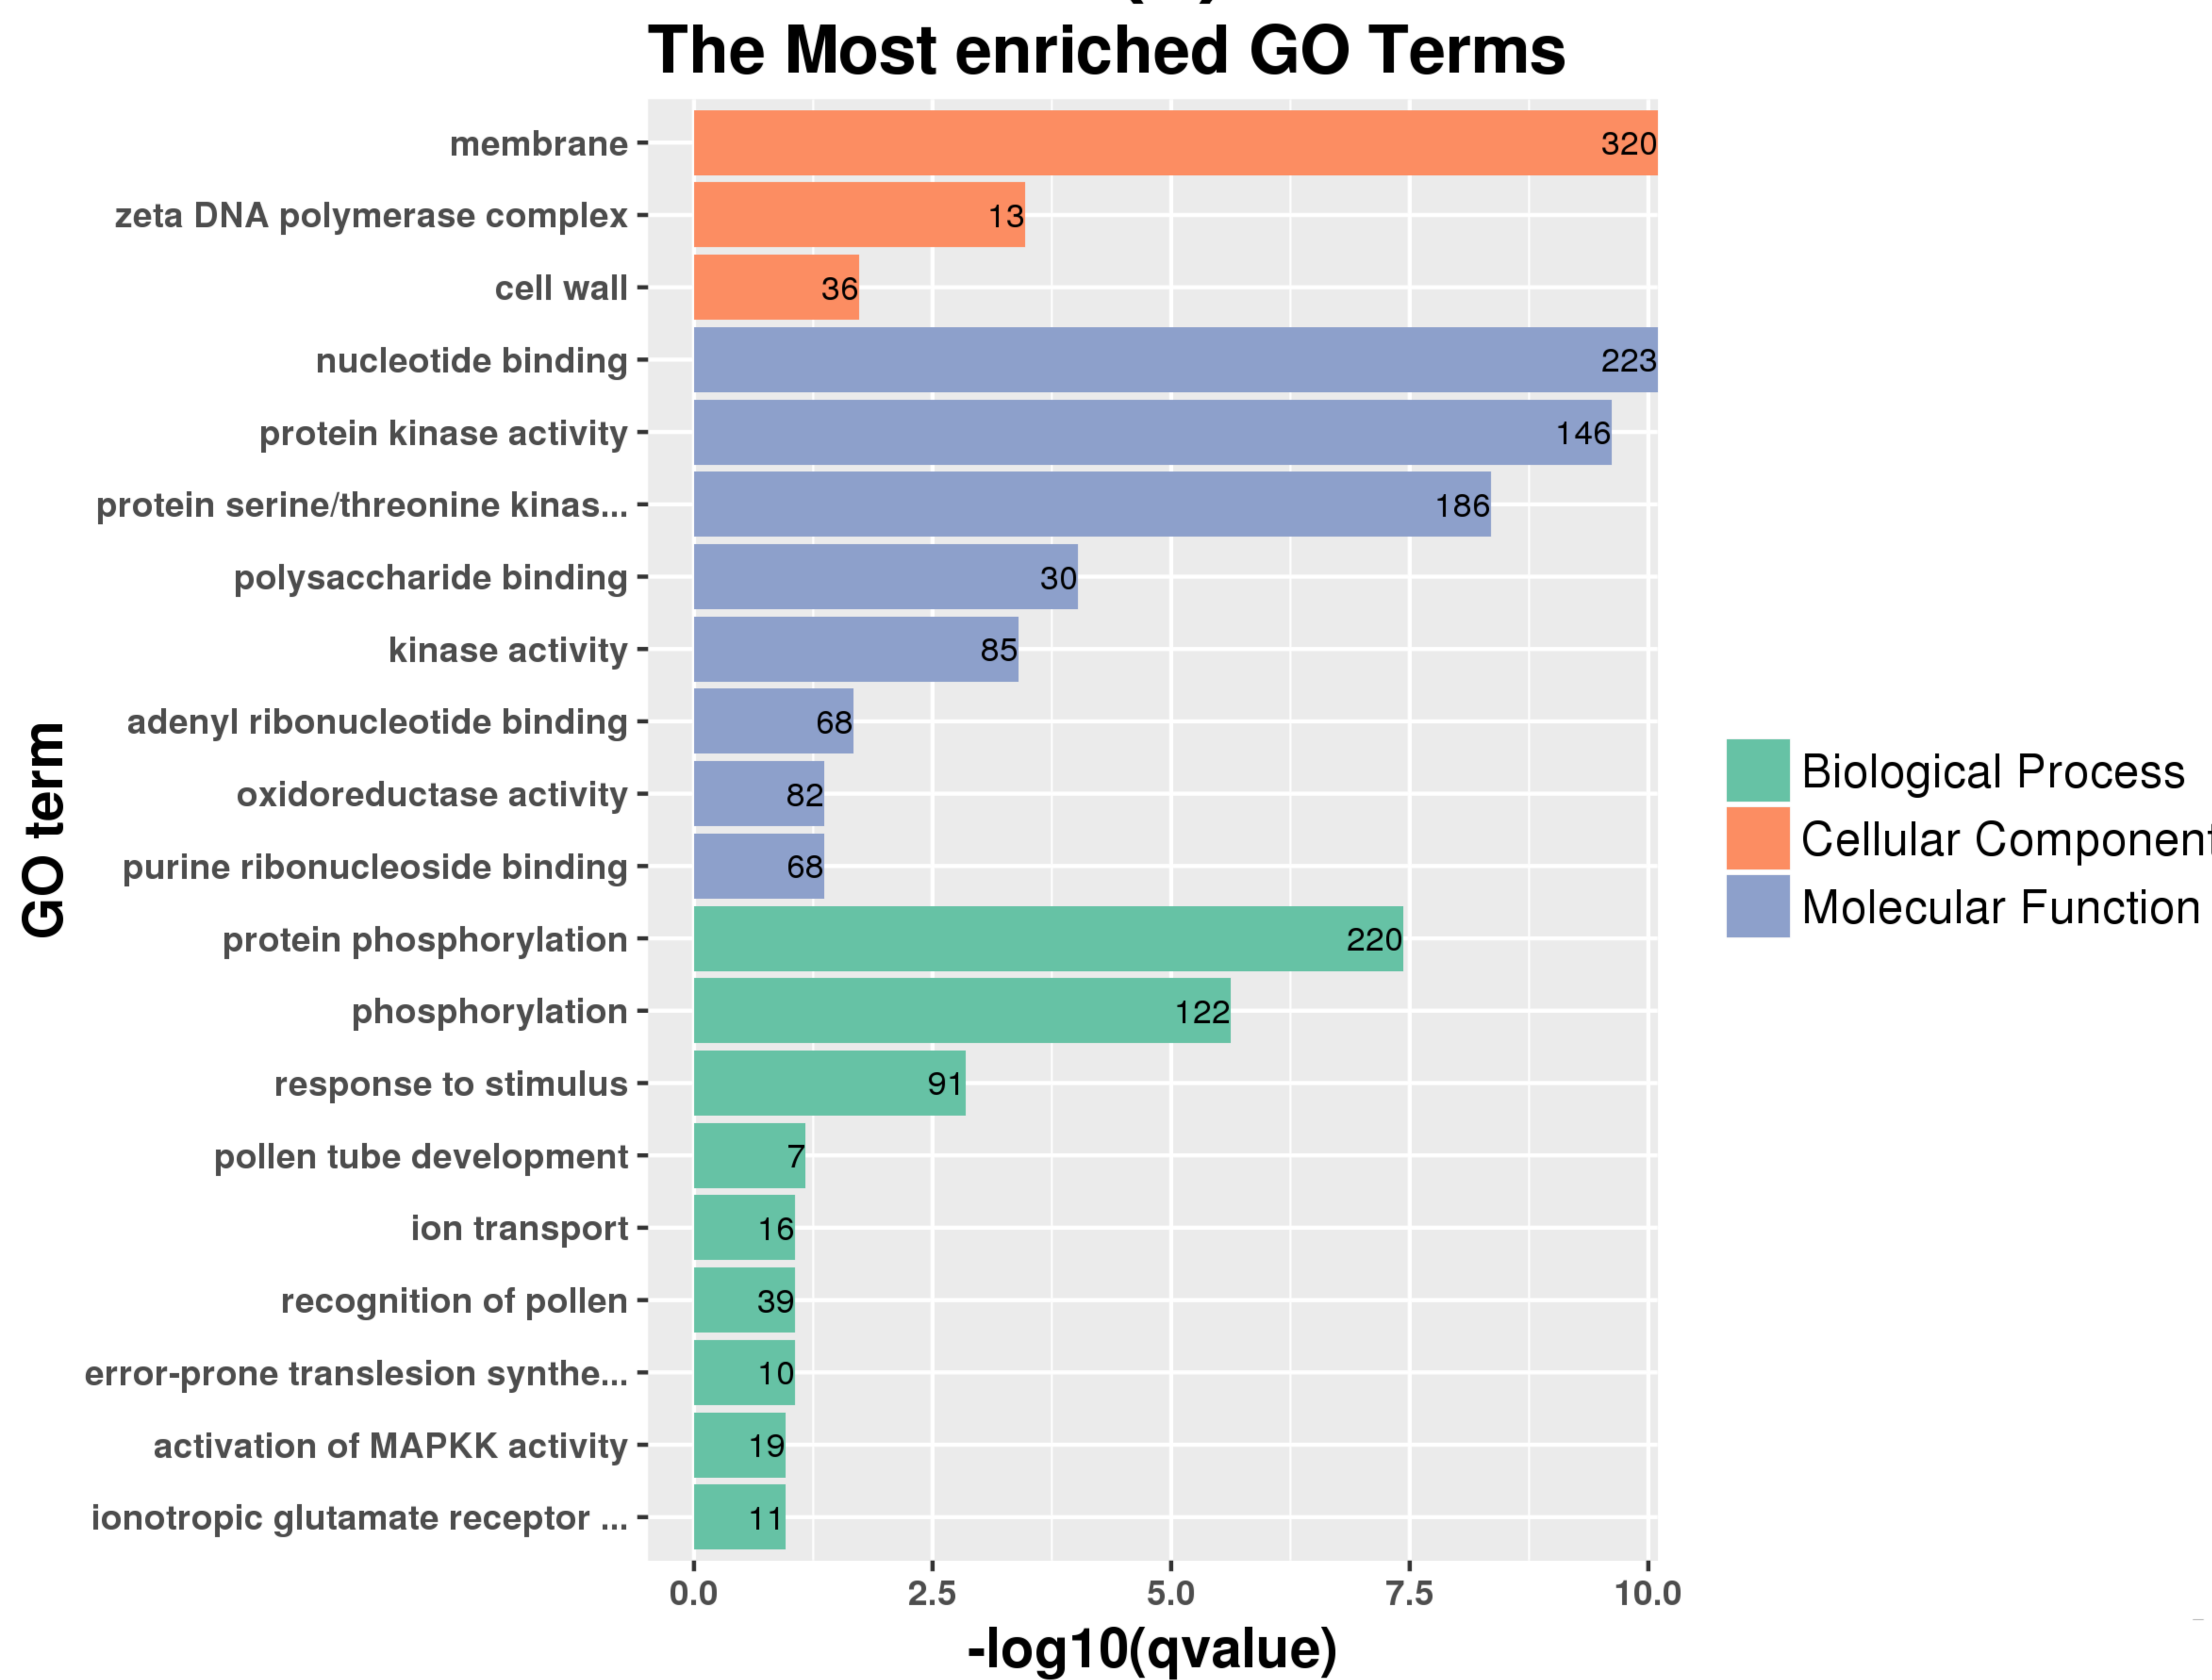

(d)

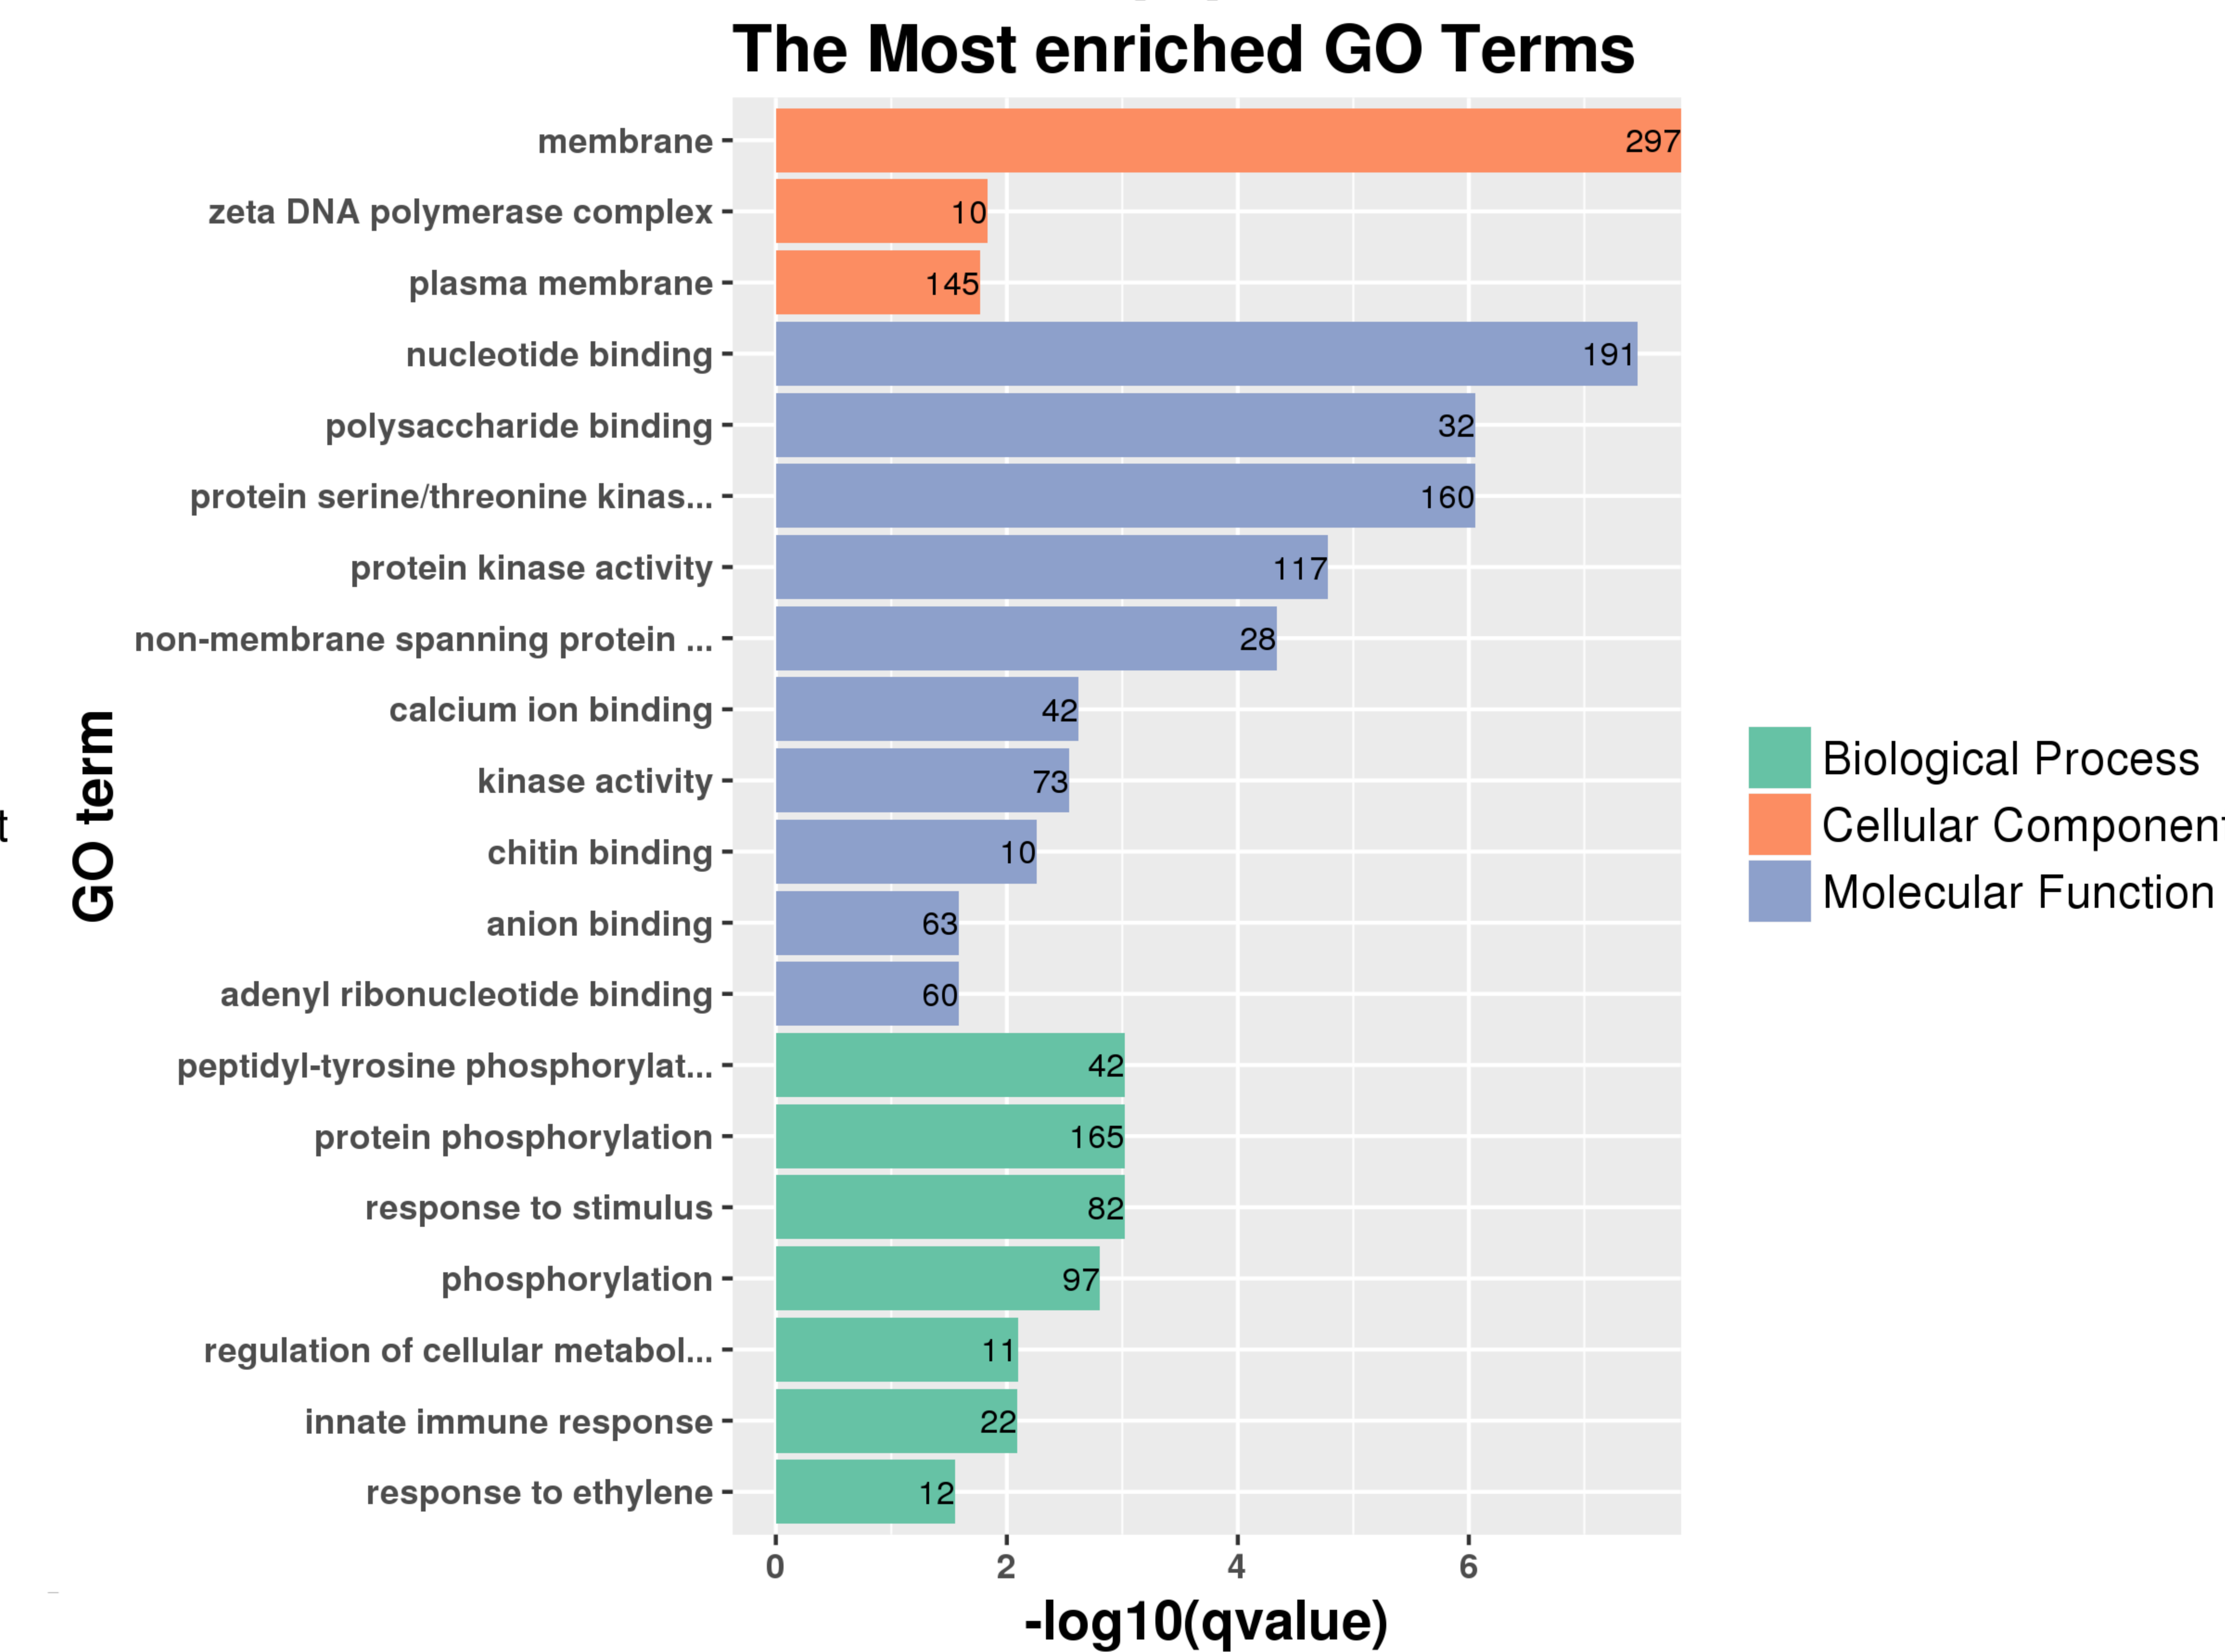

(e)

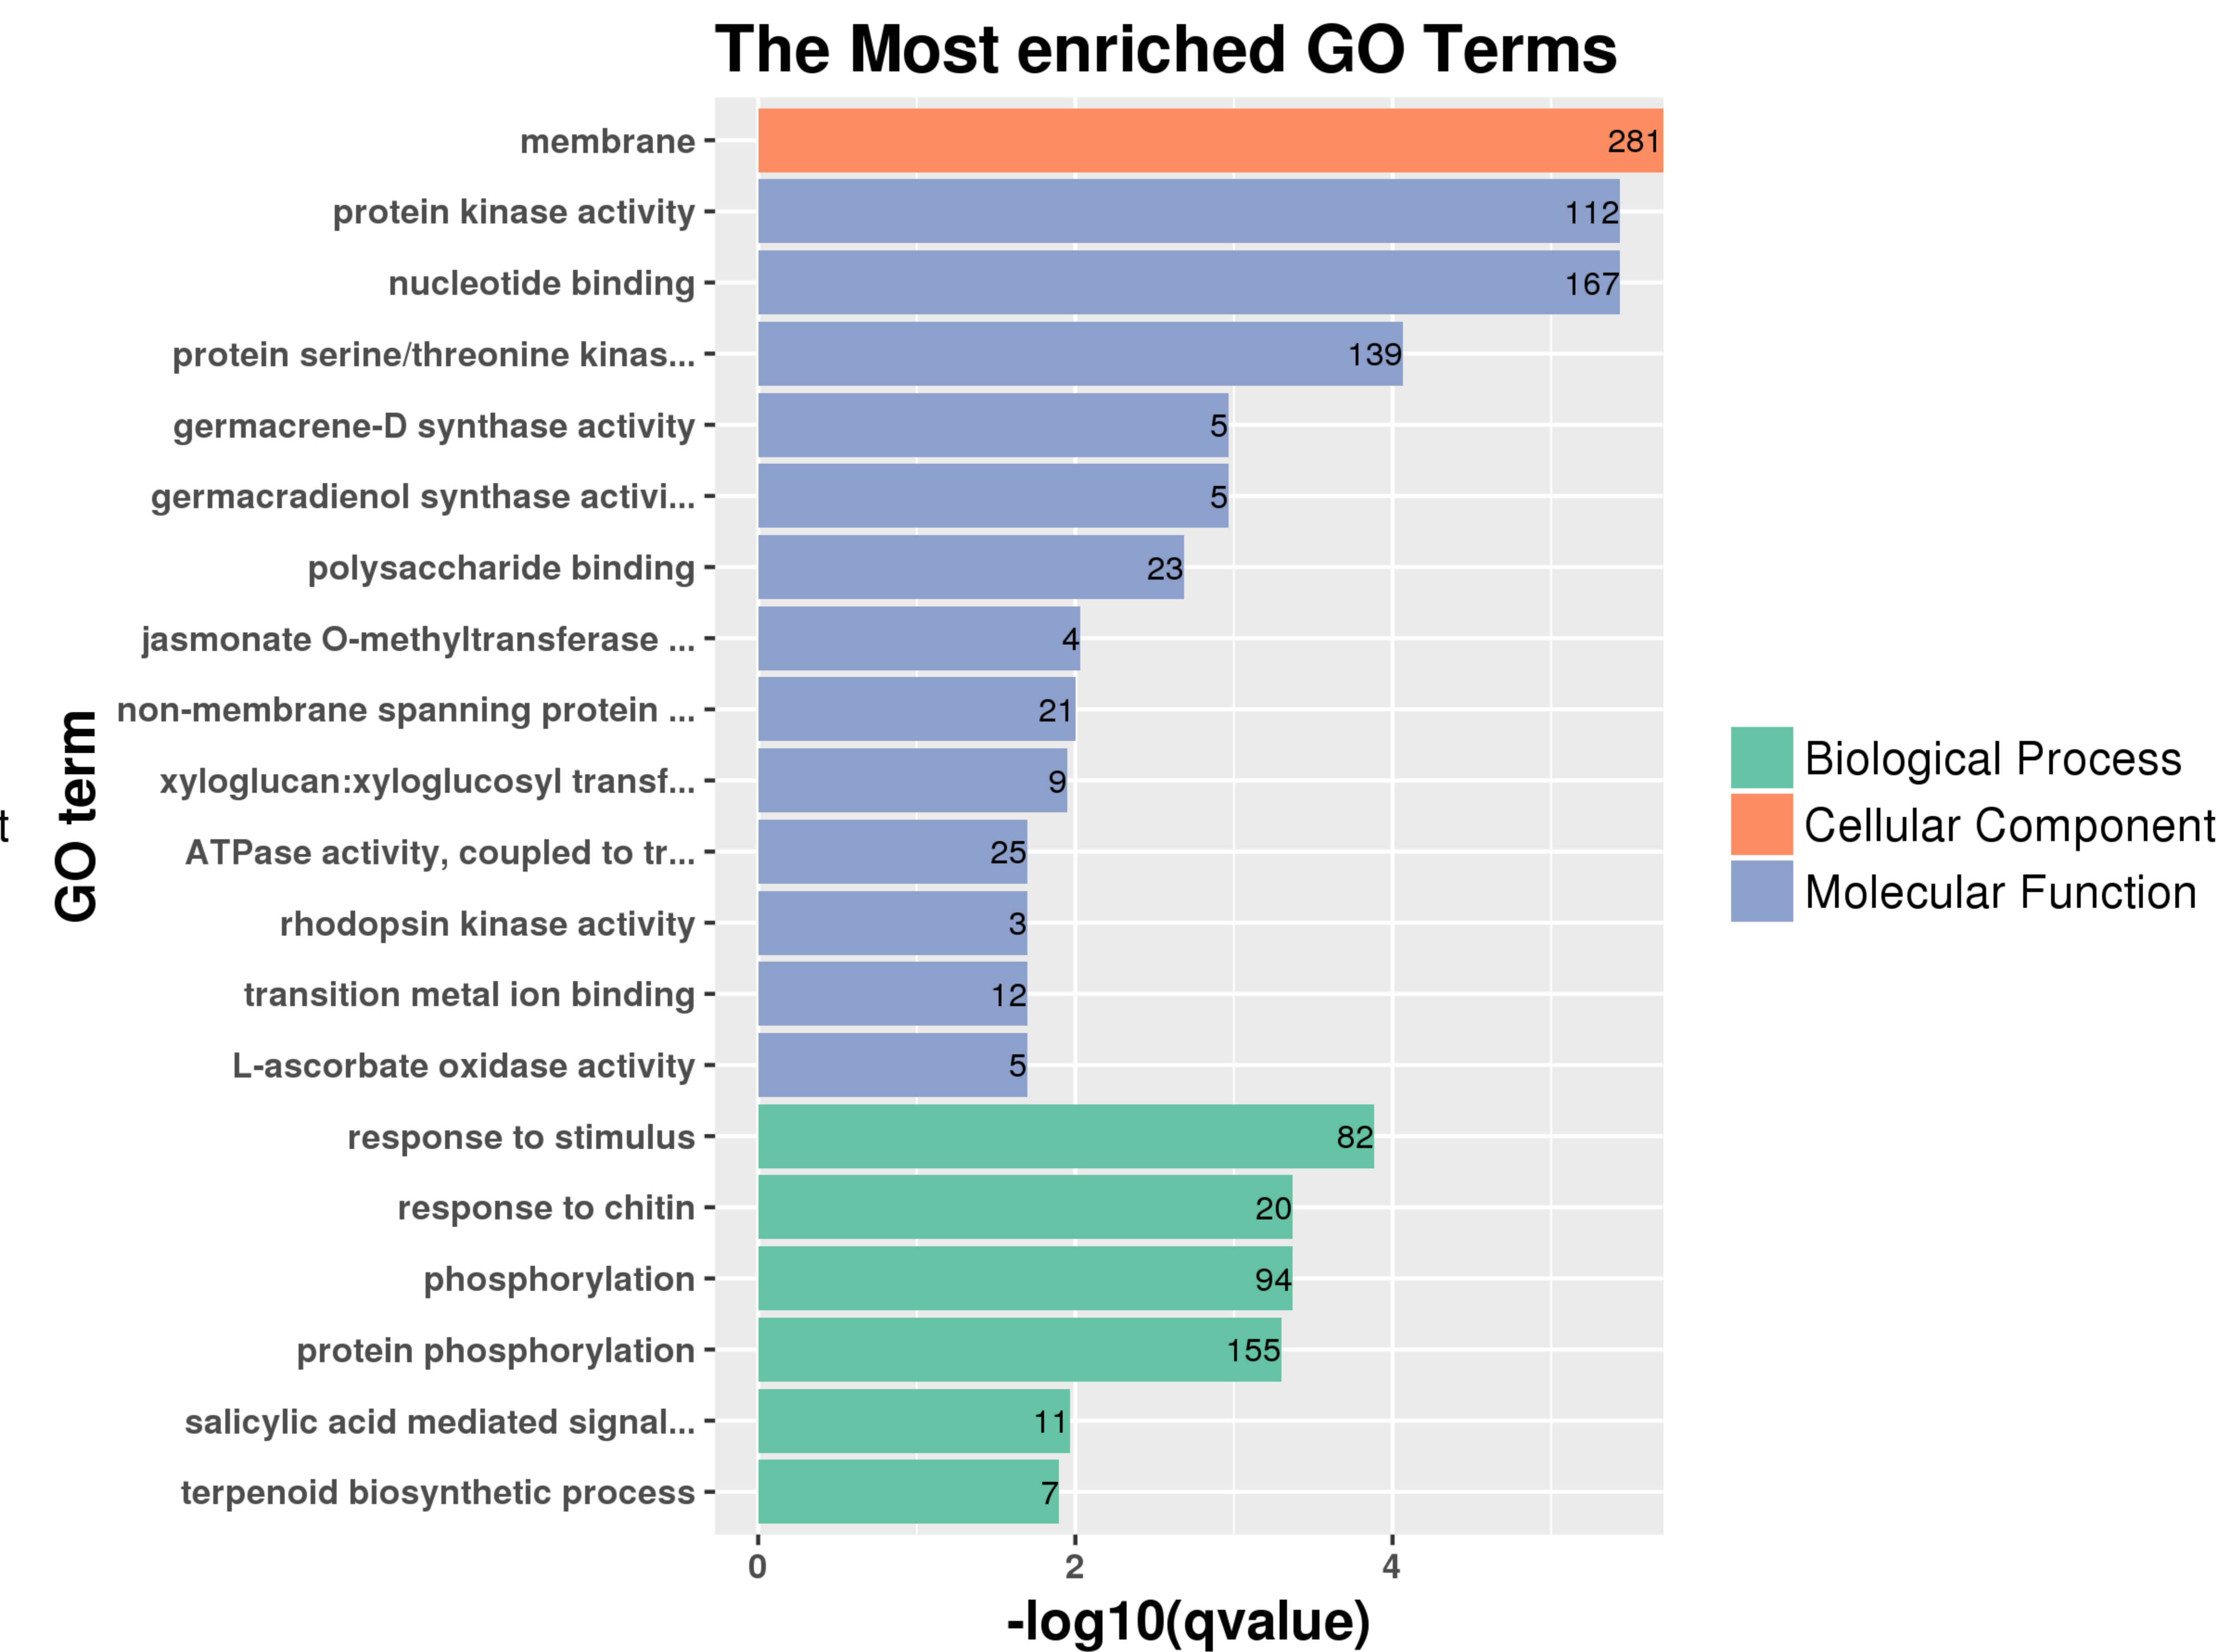

(f)

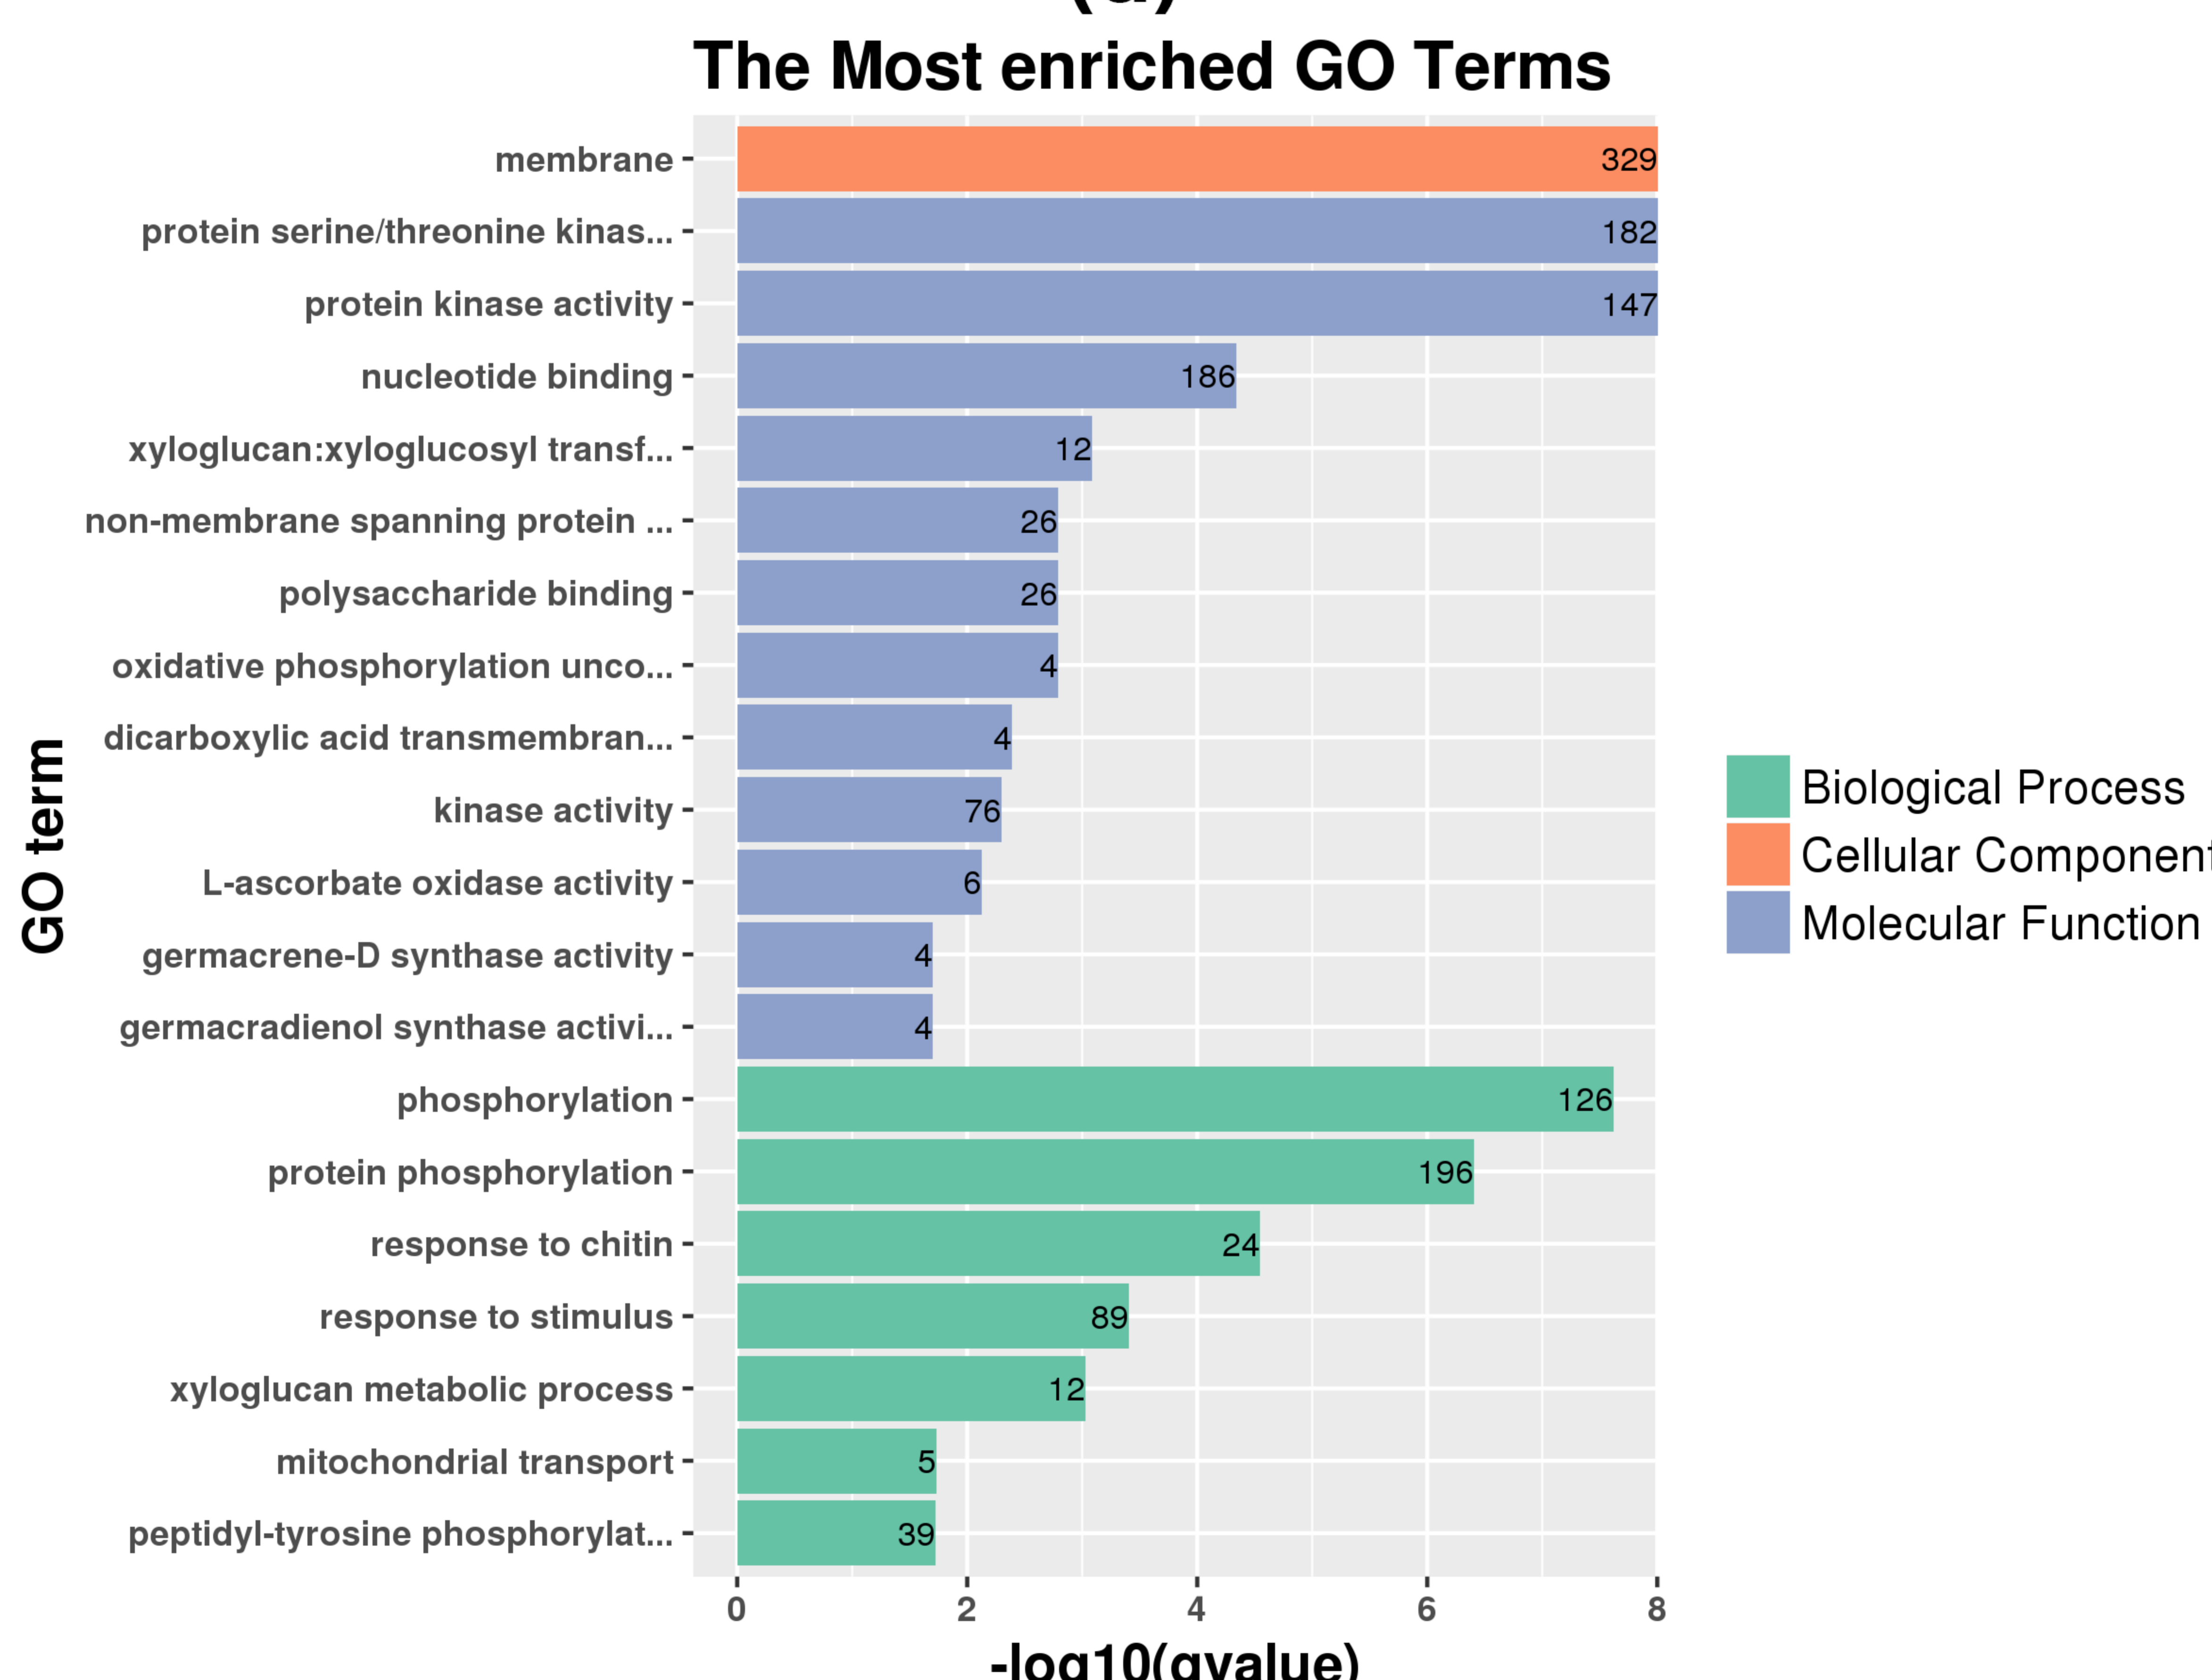

(g)

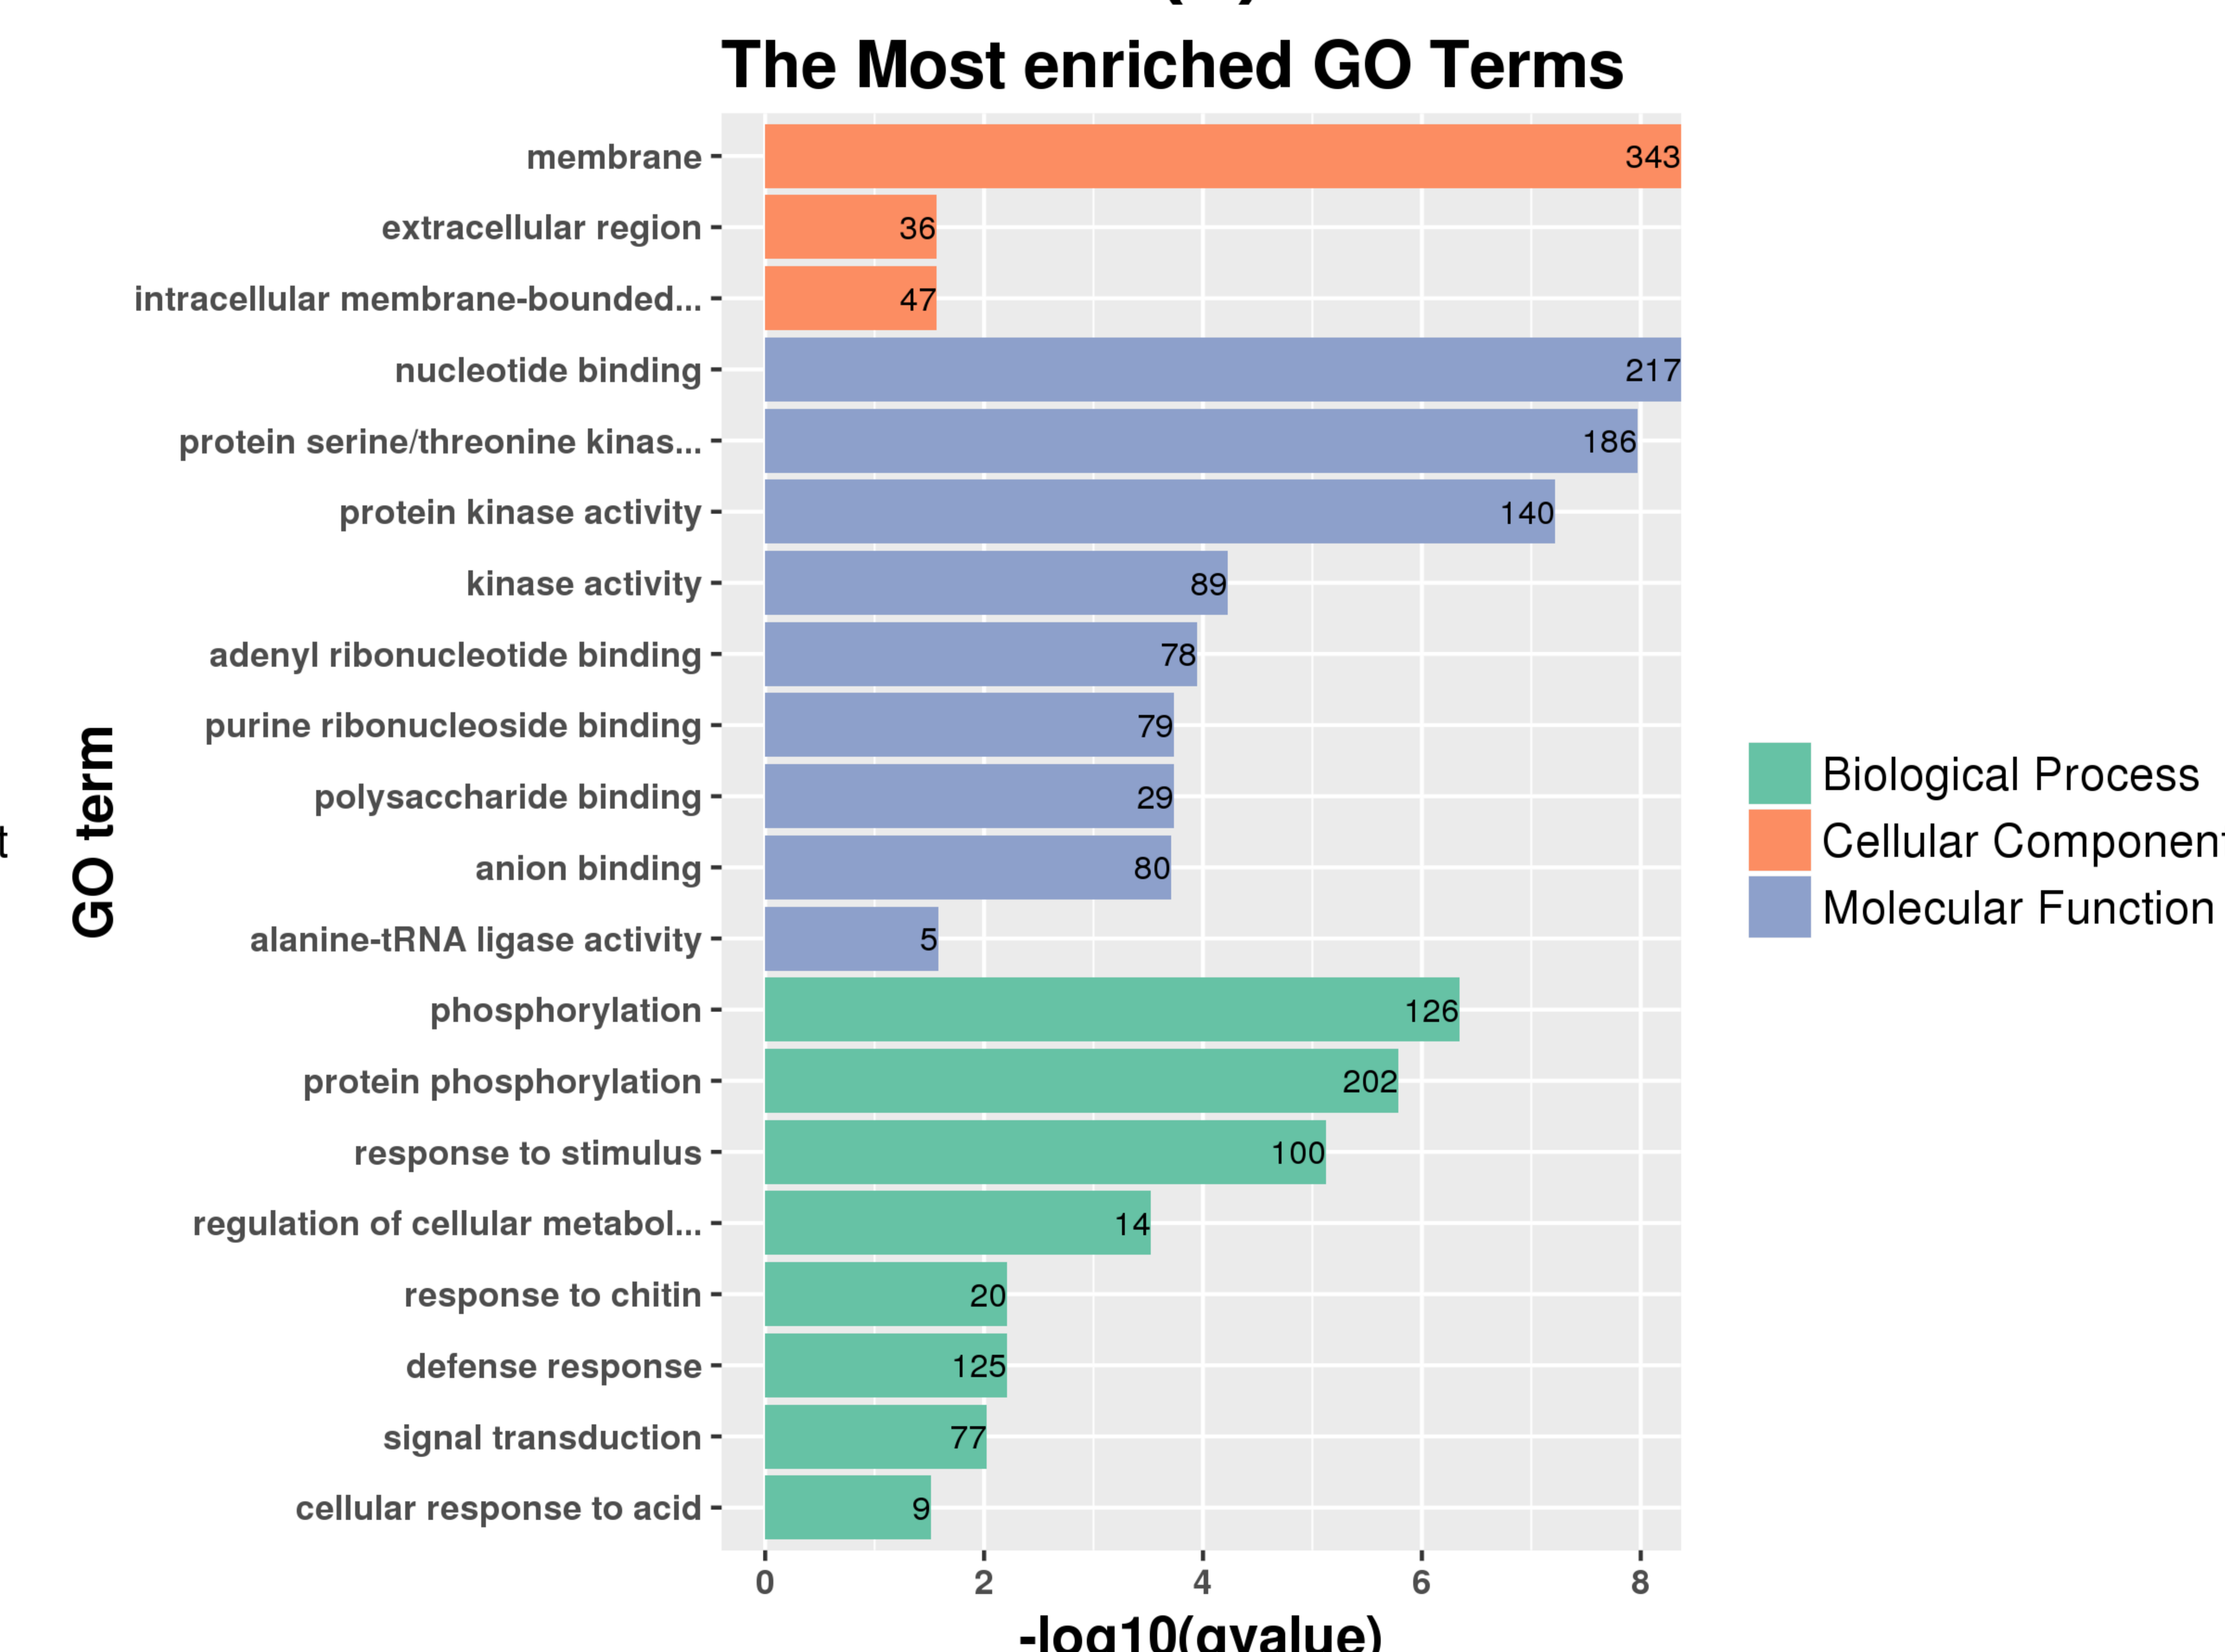

(h)

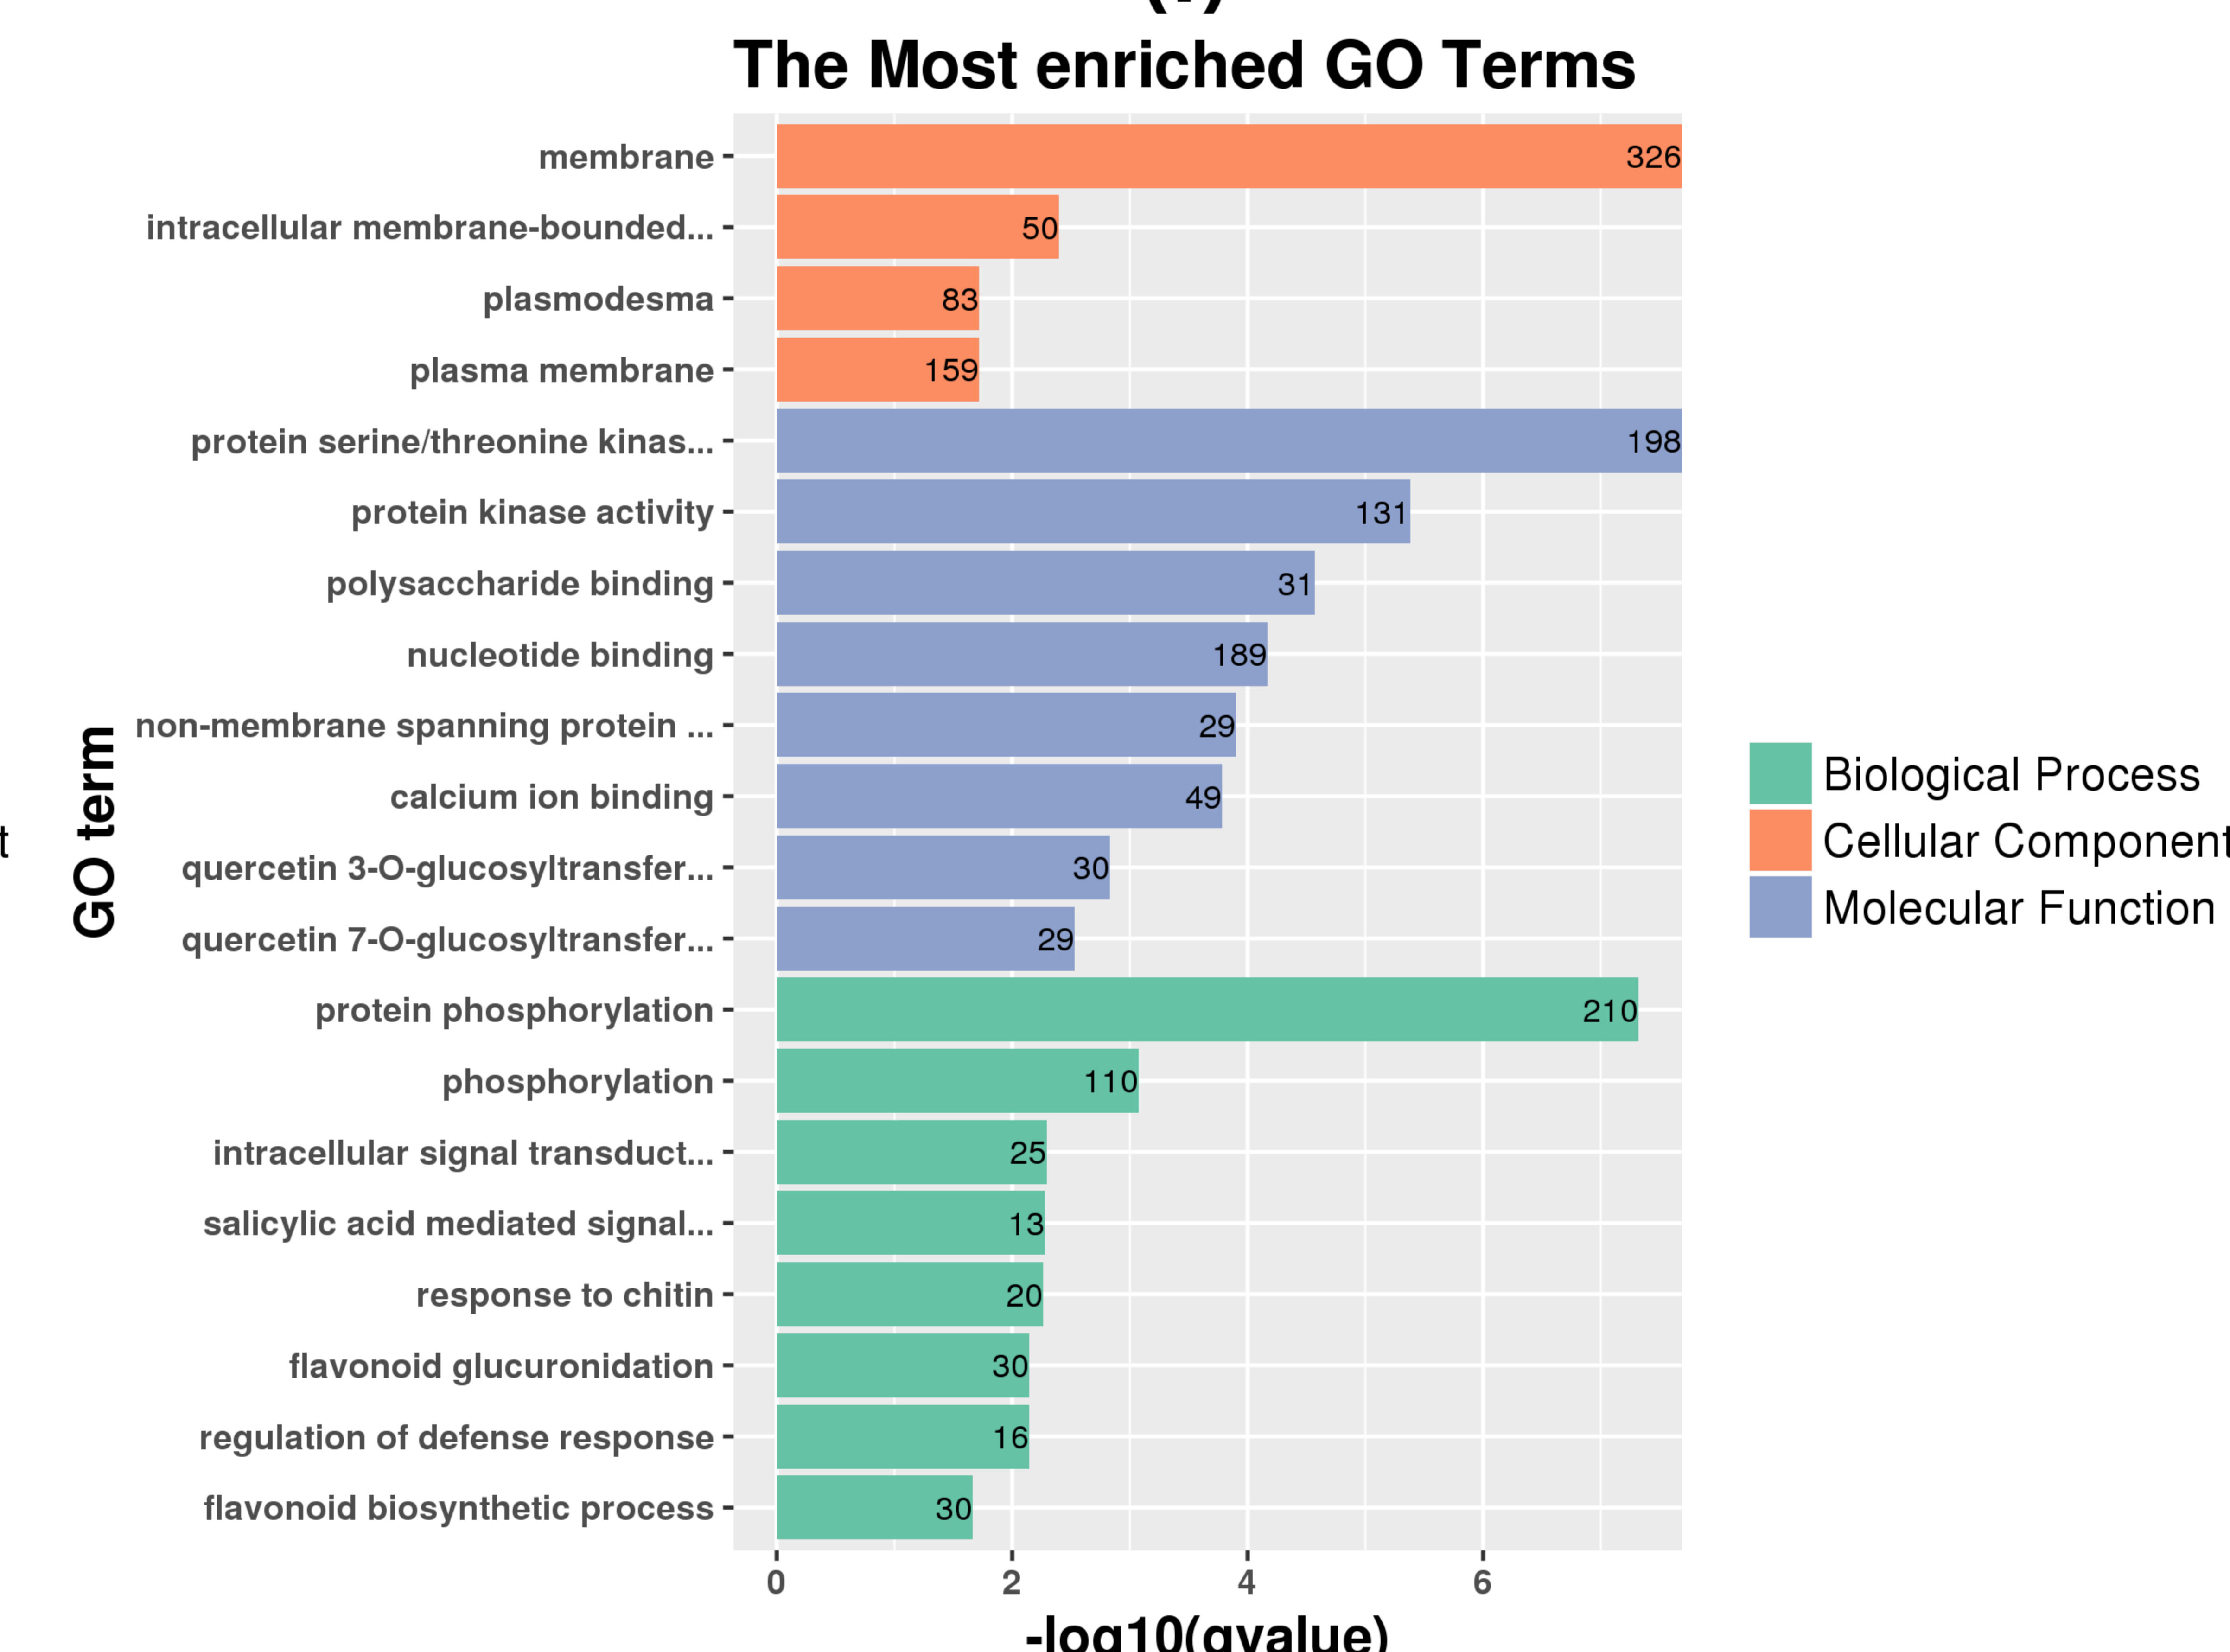

(i)

Supplement: s1 [file s1]
